# Supplementary material for: Trabectedin promotes oncolytic virus antitumor efficacy, viral gene expression, and immune effector function in models of bone sarcoma
Source: PubMed Central journal article supplement — Mol Ther Oncol. 2024 Sep 26;32(4):200886. doi: 10.1016/j.omton.2024.200886 (PMC11530761; doi:10.1016/j.omton.2024.200886), 2024-09-26
Supplement: mmc2.pdf [file mmc2.pdf]

# Trabectedin promotes oncolytic virus antitumor efficacy, viral gene expression, and immune effector function in models of bone sarcoma

Emily M. Ringwalt,<sup>1,2,14</sup> Mark A. Currier,<sup>1,14</sup> Andrea M. Glaspell,<sup>1</sup> Chun-Yu Chen,<sup>1</sup> Matthew V. Cannon,<sup>1</sup> Maren Cam,<sup>3</sup> Amy C. Gross,<sup>1</sup> Matthew Gust,<sup>1</sup> Pin-Yi Wang,<sup>1</sup> Louis Boon,<sup>4</sup> Laura E. Biederman,<sup>5,6</sup> Emily Schwarz,<sup>7,8</sup> Prajwal Rajappa,<sup>3,9,10</sup> Dean A. Lee,<sup>1,8,10,11,12</sup> Elaine R. Mardis,<sup>3,10</sup> William E. Carson 3rd,<sup>8,12,13</sup> Ryan D. Roberts,<sup>1,10,11,12</sup> and Timothy P. Cripe<sup>1,8,10,11,12</sup>

<sup>1</sup>Center for Childhood Cancer Research, Nationwide Children's Hospital, Columbus, OH 43215, USA; <sup>2</sup>Molecular, Cellular, and Developmental Biology Graduate Program, The Ohio State University, Columbus, OH 43210, USA; <sup>3</sup>Steve and Cindy Rasmussen Institute for Genomic Medicine, Nationwide Children's Hospital, Columbus, OH 43215, USA; <sup>4</sup>JJP Biologics, 00-728 Warsaw, Poland; <sup>5</sup>Department of Pathology, Nationwide Children's Hospital, Columbus, OH 43205, USA; <sup>6</sup>Department of Pathology, The Ohio State University Wexner Medical Center, Columbus, OH 43210, USA; <sup>7</sup>Biomedical Sciences Graduate Program, College of Medicine, The Ohio State University, Columbus, OH 43210, USA; <sup>8</sup>Pelotonia Institute for Immuno-Oncology, The James Comprehensive Cancer Center, The Ohio State University, Columbus, OH 43210, USA; <sup>9</sup>Department of Pediatrics and Neurological Surgery, The Ohio State University Wexner Medical Center, Columbus, OH 43210, USA; <sup>10</sup>Department of Pediatrics, The Ohio State University College of Medicine, Columbus, OH 43210, USA; <sup>11</sup>Division of Hematology/Oncology/BMT, Nationwide Children's Hospital, Columbus, OH 43205, USA; <sup>12</sup>The James Comprehensive Cancer Center, The Ohio State University, Columbus, OH 43210, USA; <sup>13</sup>Department of Surgery, Division of Surgical Oncology, The Ohio State University, Columbus, OH 43210, USA

**We previously reported that the DNA alkylator and transcriptional-blocking chemotherapeutic agent trabectedin enhances oncolytic herpes simplex viroimmunotherapy in human sarcoma xenograft models, though the mechanism remained to be elucidated. Here we report trabectedin disrupts the intrinsic cellular antiviral response which increases viral transcript presence in the human tumor cells. We also extended our synergy findings to syngeneic murine sarcoma models, which are poorly susceptible to virus infection. In the absence of robust virus replication, we found trabectedin enhanced viroimmunotherapy efficacy by reducing infiltrating immunosuppressive CD4 T and myeloid cells and stimulating granzyme expression in infiltrating T and natural killer cells to cause immune-mediated tumor regressions. Thus, trabectedin enhances both the direct virus-mediated killing of tumor cells and the viral-induced activation of cytotoxic effector lymphocytes to cause tumor regressions across models. Our data provide a strong rationale for clinical translation as both mechanisms should be simultaneously active in human patients.**

## INTRODUCTION

Immunotherapies are transforming the treatment of cancer, especially for patients with aggressive disease. Numerous advances in immunotherapy seek to strengthen the immune recognition of cancer. Oncolytic viroimmunotherapy leverages both a direct virus-mediated killing of tumor cells and a stimulation of antitumor immunity. Oncolytic virotherapies selectively replicate within cancer cells, often by taking advantage of dysregulated signaling pathways.

Currently, the only Food and Drug Administration (FDA)-approved oncolytic virotherapy is talimogene laherparepvec (T-VEC), a modified oncolytic herpes simplex virus (oHSV) used to treat recurrent melanoma.<sup>1,2</sup> New virotherapies in clinical trials take advantage of the tumor-selective replication and immune-stimulating effects these therapies possess and seek to boost clinical efficacy by elucidating potential combination approaches with immune checkpoint inhibitors, adoptive cell transfer therapies, chemotherapies, or targeted drugs.<sup>3,4</sup>

Pediatric and young adult patients with aggressive solid tumors continue to experience poor outcomes and are a population that may benefit from therapies such as oHSV. In particular, outcomes for Ewing sarcoma and osteosarcoma—the two most common pediatric tumors of the bone and surrounding soft tissue—have not improved in decades, despite collaborative international clinical trial consortia. Advanced and metastatic disease develops in 25% of patients despite standard-of-care therapy.<sup>5–9</sup> Long-term survival rates for these cases stagnate around 20%–40%.<sup>5,7,10</sup> Osteosarcoma typically forms due to sporadic mutations, often those leading to loss of tumor suppressor function and diverse phenotypic heterogeneity that supports tumor survival and metastasis.<sup>11,12</sup> This malignancy primarily metastasizes to the lungs where lung-osteosarcoma

Received 24 May 2024; accepted 24 September 2024;  
<https://doi.org/10.1016/j.omton.2024.200886>.

<sup>14</sup>These authors contributed equally

**Correspondence:** Emily M. Ringwalt, Center for Childhood Cancer Research, Nationwide Children's Hospital, Columbus, OH 43215, USA.

**E-mail:** [emily.franz@nationwidechildrens.org](mailto:emily.franz@nationwidechildrens.org)

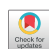

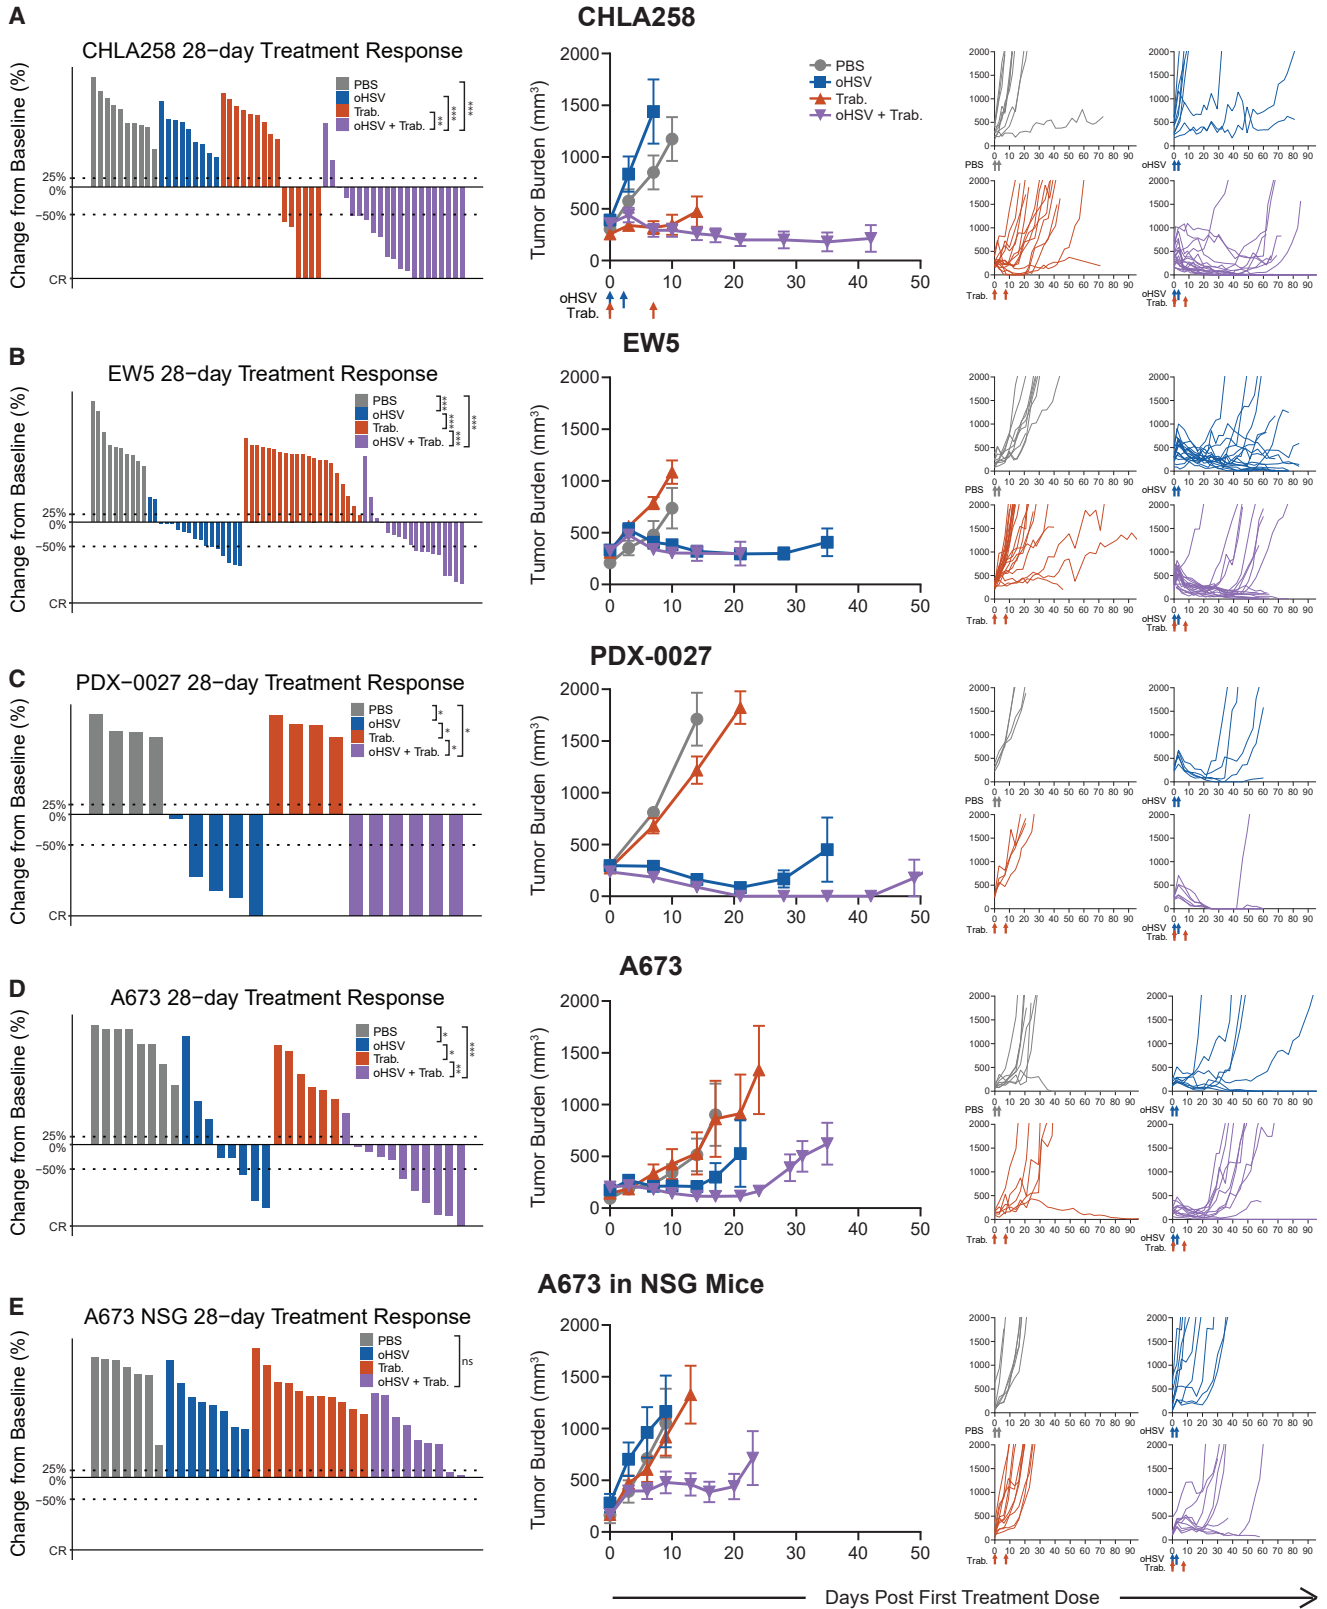

(legend on next page)

interactions support colonization and survival.<sup>13,14</sup> Ewing sarcoma is characterized by a chromosomal translocation that generally creates a fusion oncogene of the *EWSR1* gene with a member of the ETS family of transcription factors, typically *FLI1*.<sup>15</sup> The resulting fusion oncoprotein acts as an aberrant transcription factor and chromatin remodeler.<sup>15</sup>

Oncolytic viroimmunotherapy, including oHSV, has exhibited preclinical efficacy against pediatric bone sarcoma.<sup>16</sup> We found that HSV1716 (Seprehvir) displayed clinical safety and evidence of immune activation when utilized to treat pediatric solid tumors.<sup>17,18</sup> However, durable virotherapy responses remained elusive, possibly due to a rapid virus clearance by antiviral immune cells and the presence of immunosuppressive cells, such as tumor-associated macrophages and myeloid-derived suppressor cells (MDSCs), that reside within the tumor microenvironment and are enriched by tumor signaling and persistent immune activation. Thus, while clinically safe, depleting or inhibiting the immunosuppressive myeloid cells within the tumor microenvironment may be required to achieve oHSV efficacy in pediatric sarcoma patients.

Trabectedin is an alkylating agent that displays myelolytic properties and is therefore a promising candidate to disrupt the immunosuppressive microenvironment in pediatric sarcoma patients. Trabectedin is FDA-approved for the treatment of advanced liposarcoma and leiomyosarcoma and binds the minor groove DNA to disrupt gene expression, DNA repair mechanisms, and polymerase activity.<sup>19–25</sup> In Ewing sarcoma, these mechanisms of action exploit vulnerabilities for oncogene dependence, leading to tumor cell death in preclinical and clinical settings.<sup>26–30</sup> To achieve myelolytic effects, the drug induces apoptosis via TRAIL-R2 death receptor signaling in myeloid cells, but not in natural killer (NK) or T cells.<sup>20,22</sup> Recent clinical studies found that trabectedin is safe in children and adolescents with solid tumors, with some grade 3 and 4 adverse events including fatigue, neutropenia, and hepatotoxicity.<sup>31–33</sup>

In this study, we hypothesized that trabectedin would enhance oHSV virotherapy by reducing myeloid-derived immune suppression and increasing antitumor immune activation. Strikingly, our preclinical efficacy and survival results surpassed those we previously observed when combining myeloid depletion with oHSV, suggesting additional mechanisms underscore the combinatorial efficacy.<sup>34</sup> Indeed, we define a novel mechanism for synergy whereby trabectedin enhances the direct antitumor and immune stimulatory effects of oHSV. Collectively, our data provide strong preclinical evidence supporting

a combinatorial therapy consisting of oHSV and trabectedin for patients with aggressive pediatric sarcomas.

## RESULTS

### **oHSV+trabectedin therapy causes generalizable human xenograft regressions**

Given the efficacy that we previously observed in combining an oHSV with trabectedin against the Ewing sarcoma A673 xenograft,<sup>34</sup> we sought to determine if this synergy proved generalizable to other tumor models. We observed tumor burden reductions in Ewing sarcoma xenografts (CHLA258, EW5) using the previously reported combination of the oHSV rRp450 and trabectedin (Figures 1A and 1B). Each tumor model responded differently to the monotherapies: the trabectedin-sensitive CHLA258 demonstrated the known susceptibility of fusion oncogene-dependent tumors to trabectedin,<sup>26,28</sup> while EW5 exhibited sensitivity to oHSV alone. Despite these differences in susceptibility to monotherapy, both tumor models displayed the best overall response rates when treated with oHSV+trabectedin combination therapy, with numerous partial (PR = 19/39, 49%) and complete (CR = 7/39, 18%) responses by day 28 (Figures 1A, 1B, and S1). The disease stabilization rate (DSR = CR + PR + SD) for combination-treated EW5 (DSR = 16/18, 89%) nearly equaled that of oHSV monotherapy (DSR = 15/17, 88%), yet a higher proportion of tumors responded to the combination therapy (CR + PR = 9/18, 50% vs. 6/17, 35%) (Figure S1). For CHLA258, the combination therapy conferred a significant survival advantage over the monotherapies, despite the model's vulnerability to trabectedin alone (Figure S2). Thus, the combination of oHSV and trabectedin induced tumor regressions in these Ewing sarcoma xenograft models with varying sensitivities to each monotherapy.

To test whether this combinatorial efficacy is maintained across oHSV constructs, we also combined trabectedin with HSV1716, an oHSV shown to be clinically safe in pediatric patients.<sup>17</sup> Indeed, the combination proved efficacious against both rhabdomyosarcoma PDX-0027 (CR = 6/6, 100%) and Ewing sarcoma A673 (CR + PR = 6/11, 55%) xenografts (Figures 1C, 1D, and S1). The synergy of trabectedin with oHSV extended from numerous human xenograft models to differing oHSV constructs, indicating that trabectedin combined with oHSV offers reproducible synergistic efficacy across multiple model systems.

### **NK cells contribute to the combinatorial efficacy against Ewing sarcoma in immunodeficient mice**

To characterize the mechanism behind the synergy between oHSV and trabectedin, we investigated the role of the immune microenvironment in the combination efficacy. If trabectedin modulated

#### **Figure 1. oHSV+trabectedin synergizes to increase the disease control rate and reduce tumor burden in human xenograft models**

The best response for each treated tumor through 28 days, the average tumor burden, and spider plots tracking individual tumor volumes over the full study period are shown for (A) CHLA-258 (Ewing sarcoma), (B) EW5 (Ewing sarcoma), (C) PDX-0027 (rhabdomyosarcoma), (D) A673 (Ewing sarcoma), and (E) A673 in NSG-SGM3 NK-deficient mice (lack T, B, and NK cells). PBS and oHSV ( $1.0 \times 10^7$  pfu) were given intratumorally (i.Tu.) on days 0 and 2. Trabectedin (0.15 mg/kg) was given intravenously (i.v.) on days 0 and 7. Statistical analyses of the disease control rates (CR + PR + SD) were performed using a pairwise Fisher's exact test with *p* values adjusted using the Benjamini-Hochberg procedure; \**p* ≤ 0.05, \*\**p* ≤ 0.01, \*\*\**p* ≤ 0.001. Summarized data with error bars depict mean ± SEM.

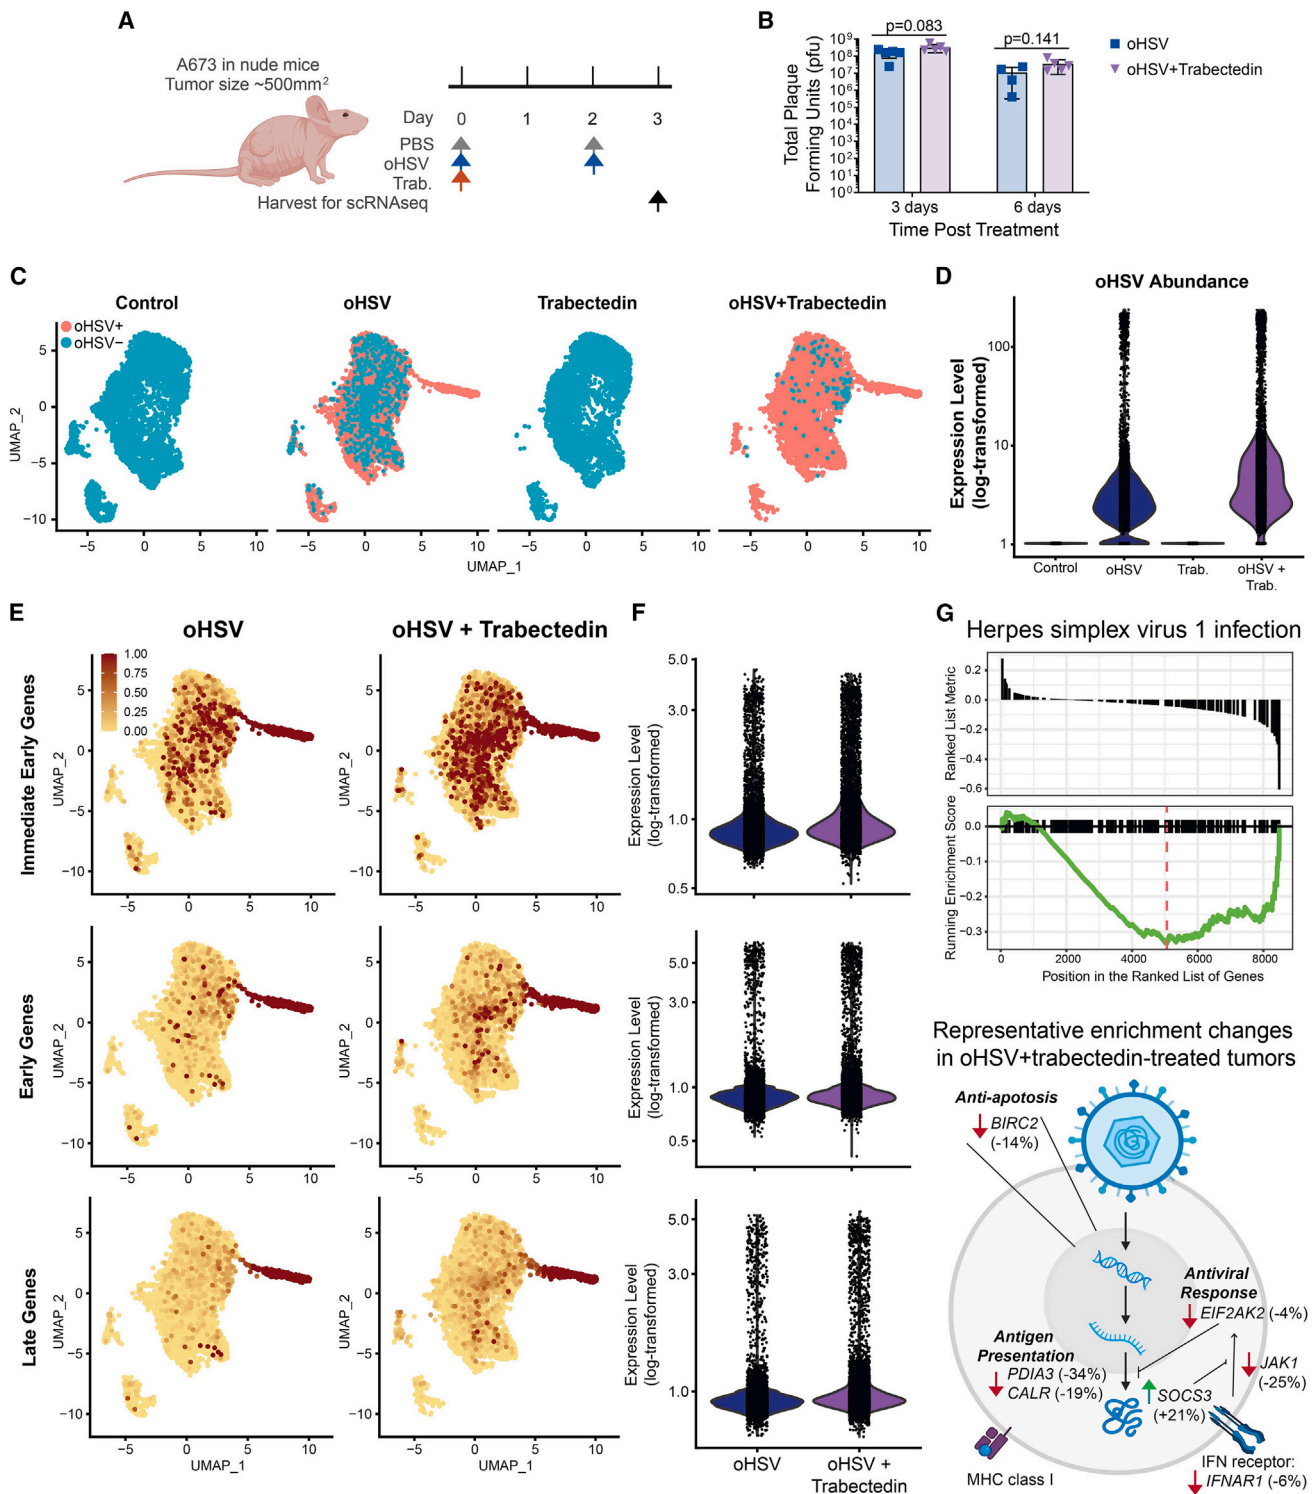

**Figure 2. Trabectedin increases viral intracellular prevalence and decreases antiviral gene expression in immunodeficient Ewing sarcoma models**

(A) Treatment schema for scRNA-seq tumor collection: PBS and oHSV ( $1.0 \times 10^7$  pfu) were given i.Tu. on days 0 and 2, trabectedin (0.15 mg/kg) was given i.v. on day 0, and scRNA-seq samples were collected on day 3 to ensure sufficient cell viability for sequencing ( $n = 2$  per treatment group). (B) oHSV viral titer (pfu) from A673 tumors 3 days or 6 days following treatment with a single dose of oHSV or oHSV+trabectedin. Error bars indicate standard deviation and the  $p$  values from a Student's unpaired  $t$  test between

(legend continued on next page)



immunosuppressive myeloid cells, we anticipated that the mechanism of synergy involved an increase in activated immune effector cells. Given the nature of xenograft models, the immunodeficient (T and B cell-deficient) mouse model necessary for human tumor growth restricted this effector subset to NK cells. To determine the reliance of combination efficacy on these NK cells, we removed NK cells from the system by using a mouse model deficient in NK cells (Figure 1E). In this model, the combination therapy no longer induced tumor shrinkages, though there was still evidence of survival advantage despite the absence of NK cells (Figure S2). A lower overall response rate in the absence of NK cells (SD = 2/9, 22% and CR + PR = 0/9, 0%) suggests that there is a role for NK cells in driving tumor regressions in these xenograft models (Figure S1). However, whether this mechanism operated alone or in concert with another mechanism to achieve combination efficacy required further investigation.

#### **Trabectedin increases oHSV transcript intracellular prevalence and decreases expression of the intracellular intrinsic antiviral response**

To gather an in-depth, high-resolution snapshot of the treatment-induced effects in the cells of the tumor microenvironment, we performed single-cell RNA sequencing (scRNA-seq,  $n = 2$ ). We first identified the time course of viral presence and tumor cell death to ensure we collected samples before widespread treatment-mediated cell death, which prevented analyses at later time points (Figure S3). We chose to collect tumor samples on day 3 following treatment initiation in order to capture sufficient living cells while retaining the possibility to observe treatment-related effects (Figure 2A). Given the known ability of trabectedin to bind to DNA and disrupt gene expression,<sup>25</sup> we sought to observe the effects of treatment on a transcriptional level. To capture the effects on virus gene expression, we also analyzed the treated tumors for oHSV transcript presence. While we hypothesized that trabectedin may increase viral infection, we did not observe any significant difference in recoverable live virus of tumors from animals treated with the combination compared to tumors from animals treated with oHSV alone (Figure 2B). Despite the lack of increased virus titers, we found that trabectedin increased the detectable numbers of tumor cells containing oHSV transcripts and the abundance of oHSV transcripts in tumor cells (Figures 2C and 2D).

We distinguished the three known transcriptional stages of HSV cellular infection—immediate early, early, and late genes—and calcu-

lated a module score for all the genes in each category to elucidate whether the effect of trabectedin on increased intracellular oHSV transcript prevalence was merely due to a leakiness of dying cells or was biologically relevant. If viral transcripts were spread in a nondiscriminatory mechanism via dying cells, we would expect cells to display a random distribution of transcripts from differing transcriptional stages of infection. In contrast, we observed that the trabectedin-mediated increase in oHSV transcript presence correlated with increases in infection stage-specific genes in a manner that reflected the timeline of cellular infection (Figures 2E, 2F, and S4A). We also distinguished one cluster of highly infected and likely actively oHSV-replicating cells, as seen in the high expression of genes from all stages of oHSV infection.

To explain the trabectedin-mediated increase in oHSV transcript presence, we analyzed tumor cells for genes and pathways related to the intracellular response to the virus. We found that the combination-treated tumor cells showed a decreased enrichment of the herpes simplex virus 1 infection pathway, compared with oHSV-treated tumor cells (Figure 2G). This pathway consisted not of HSV genes, but rather intracellular responses to HSV infection. Most notably, this pathway includes intracellular antiviral responses, such as PKR (*E1-F2AK2*) signaling and anti-apoptotic factors, both of which showed decreased expression in combination-treated tumors (Figures 2G and S4B). Trabectedin disrupted the gene expression of the antiviral response, which was associated with increased oHSV transcripts within cells. Based on the lack of difference in productive viral infection between mono- and combinatorial therapies (Figure 2B), cell death likely occurred prior to a productive infection. Thus, the mechanism of efficacy in human Ewing sarcoma xenografts may be due to trabectedin-mediated oHSV intracellular pathogenesis and downstream cell death.

#### **oHSV+trabectedin synergy extends to immunocompetent osteosarcoma models**

We also sought to determine the effect of trabectedin in immunocompetent tumor models. Because none exist for Ewing sarcoma, we utilized immunocompetent osteosarcoma mouse models to determine the effects of combination treatment in a model with an adaptive immune system. Mouse cells are relatively non-permissive to HSV-1 infection, thus necessitating the use of both human xenograft and murine tumor models to understand the effect of oHSV+trabectedin treatment in human patients—where HSV-sensitive human cells and a full immune system are both present.

---

treatment groups at each time point are shown. (C) UMAP plots of oHSV transcript presence in all tumor cells, split by treatment group, from the merged scRNA-seq datasets. (D) Violin plot of the expression level (log-transformed) of all oHSV transcripts for all tumor cells in each treatment group. (E) Expression level of HSV time-dependent gene modules shown as a feature plot (UMAP) for all tumor cells and split by treatment groups that contained oHSV. A relative expression cutoff of 1 minimized color skewing by high-expressing outlier cells and maintained color scale consistency between feature plots. (F) Violin plot of the expression level (log-transformed) of HSV time-dependent gene modules for all tumor cells in treatment groups that contained oHSV. (G) Results from gene set enrichment analysis showing the running enrichment score for the “Herpes simplex virus 1 infection” pathway, which represents the intrinsic cellular response to HSV-1. Gene set enrichment analysis was performed on a gene list which was ranked by the gene expression fold change (log2FC) calculated for tumor cells treated with oHSV+trabectedin compared with those treated with oHSV monotherapy. The schema displays key genes from the “Herpes simplex virus 1 infection” pathway with their respective percent change shown in parentheses (a negative value indicates lower expression in tumors treated with oHSV+trabectedin, as compared to oHSV-treated tumors).

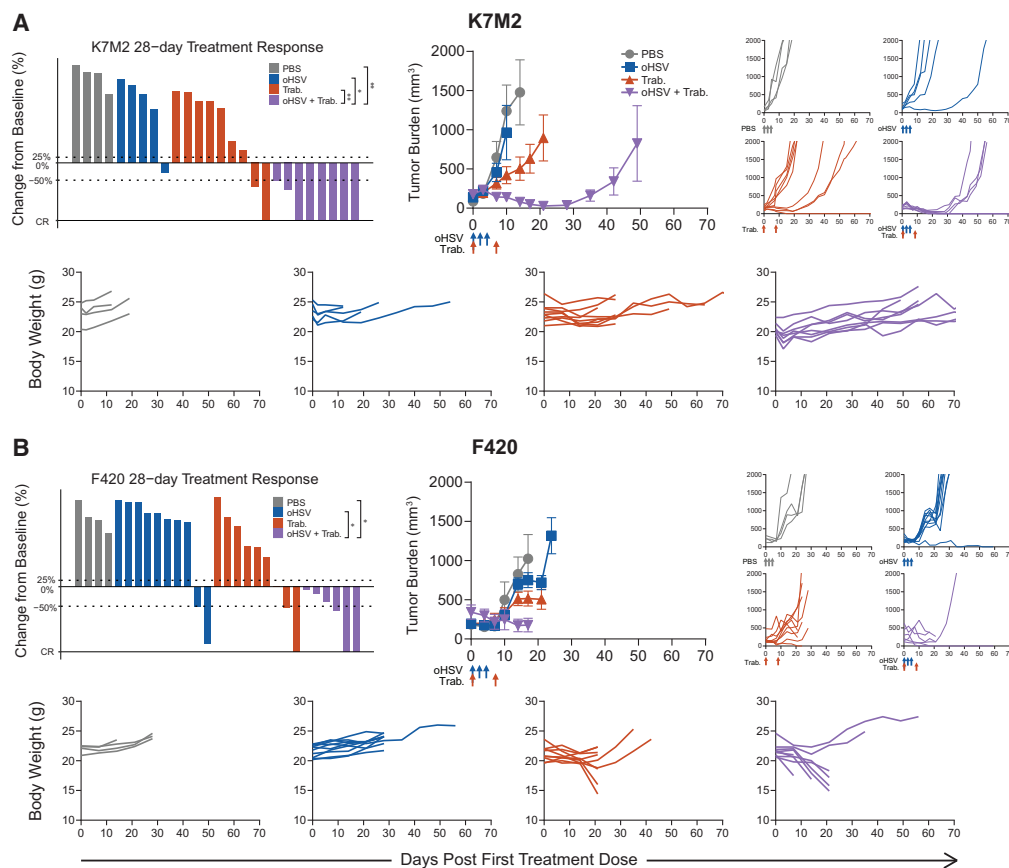

**Figure 3. Trabectedin improves oHSV antitumor efficacy with reproducibility in immunocompetent osteosarcoma mouse models**

The best response for each treated tumor through 28 days, the average tumor burden, spider plots, and individual body weights are shown for treated osteosarcoma models (A) K7M2 and (B) F420 in immunocompetent BALB/c and B6-albino mice, respectively. Body weight plots include mice that were excluded from the tumor burden analyses due to early non-tumor-related endpoints. PBS and oHSV ( $1.0 \times 10^8$  pfu) were given i.Tu. on days 0, 2, and 4. Trabectedin (0.15 mg/kg) was given i.v. on days 0 and 7. Statistical analyses of the disease control rates (CR + PR + SD) were performed using a pairwise Fisher's exact test with  $p$  values adjusted using the Benjamini-Hochberg procedure; \* $p \leq 0.05$ , \*\* $p \leq 0.01$ , \*\*\* $p \leq 0.001$ . Summarized data with error bars depict mean  $\pm$  SEM.

We again observed the reproducibility of oHSV+trabectedin synergy in two osteosarcoma models, K7M2 and F420, in immunocompetent mice (Figures 3A and 3B). Unlike the xenograft Ewing sarcoma models, neither osteosarcoma model responded to the monotherapies. Combination-treated animals possessed the lowest average tumor burden and highest response rates. In the case of K7M2, the combination treatment induced tumor regressions by day 28 (CR + PR = 8/8, 100%) and conferred a significant survival advantage (Figures S1 and S2). Unfortunately, we found that trabectedin alone and the combination therapy were hepatotoxic in F420-bearing animals due to the C57BL/6 background and trabectedin dose alterations reduced efficacy (Figures 3B and S5A–S5F). This prevented us from assessing any potential combinatorial advantage in this model. However, before mice reached the toxicity-induced weight loss endpoint, the combination-treated F420 animals exhibited decreased tumor burden and increased response and disease stabilization rates (CR + PR = 3/6, 50%; DSR = 6/6, 100%) compared with those treated with the monotherapies. Thus, osteosarcoma immunocompetent

models maintained the efficacy of combination therapy observed in Ewing sarcoma xenograft models.

#### Trabectedin modulates immunosuppressive cells and enhances cytotoxic effector cell stimulation

To determine the mechanism of combination synergy in immunocompetent osteosarcoma models, we again performed scRNA-seq on treated tumors. Given the low infectivity of HSV-1 for mouse cells, we focused on other potential trabectedin-induced changes. Characterization of all cells in the microenvironment using mouse cell type references and cell marker gene expression coupled with unbiased recursive cluster assignment showed infiltration of NK cells, T cells, monocytes, and macrophages (Figure 4A; Figures S6A–S6D). Pathway analysis for each of the infiltrating cell types indicated an enrichment of the Kyoto Encyclopedia of Genes and Genomes (KEGG) pathway “Natural killer cell mediated cytotoxicity” in infiltrating NK and T cells (Figure 4B). Using fluorescence-associated cell sorting (FACS) to complement these observations on a protein

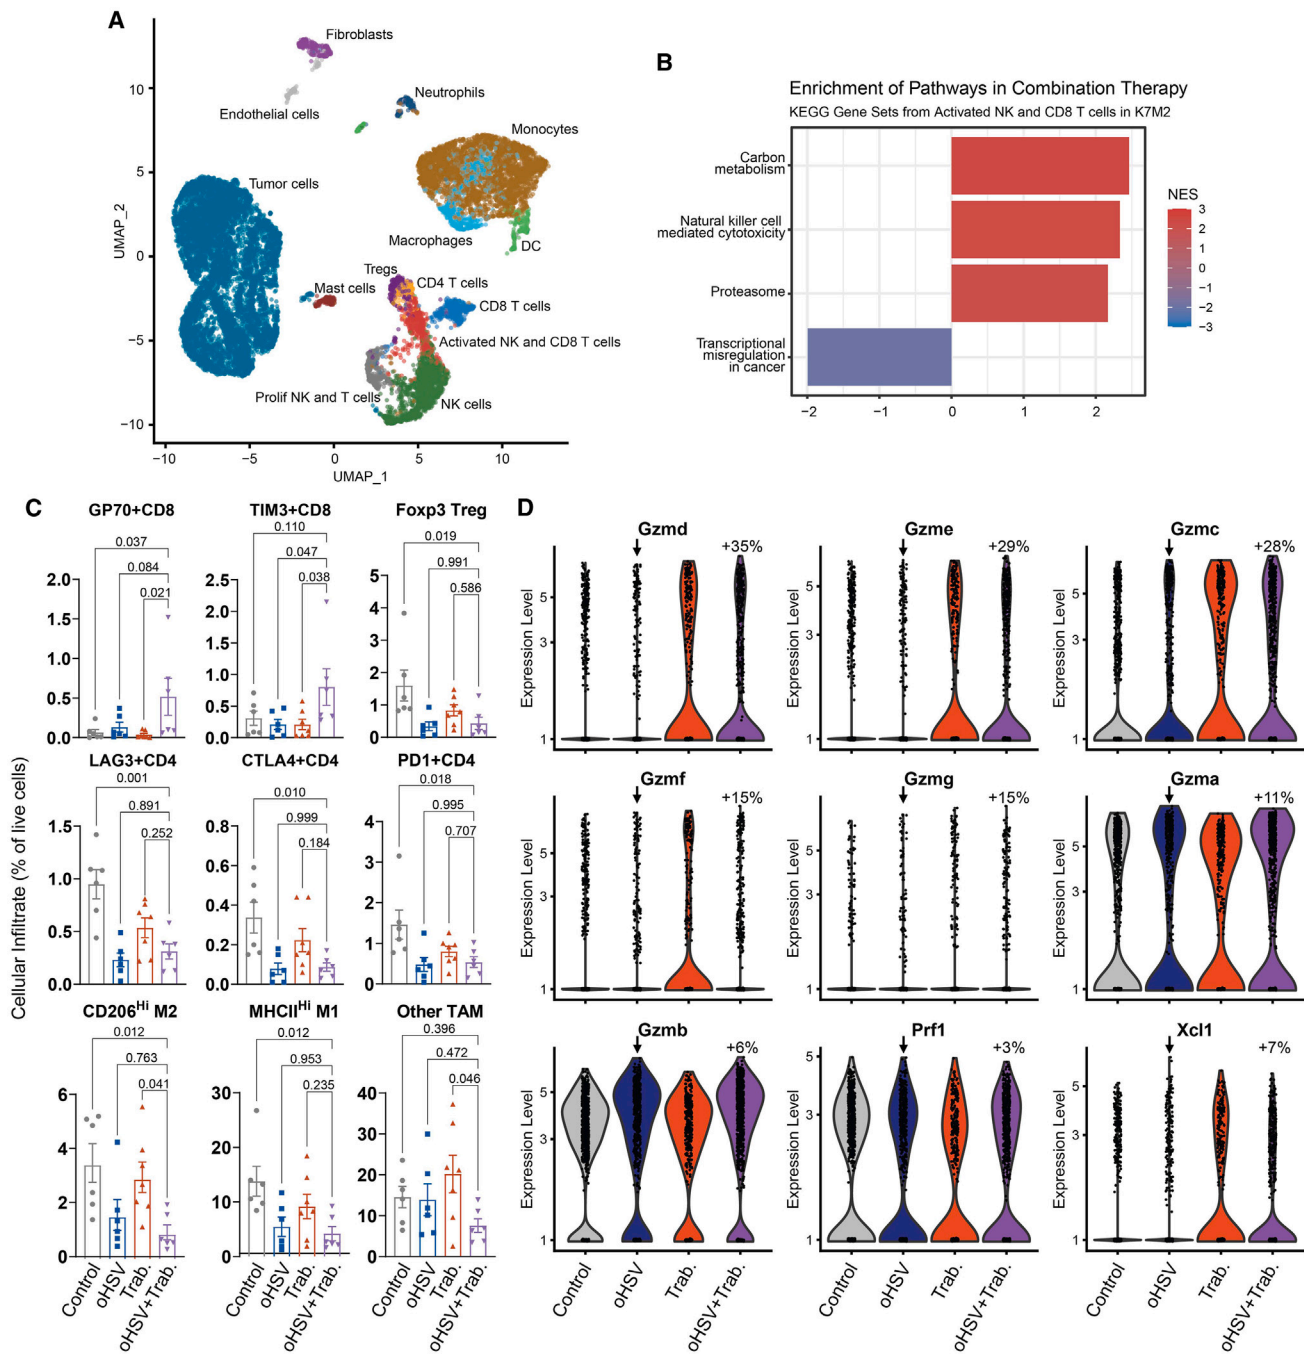

**Figure 4. Trabectedin reduces immune suppression and enhances effector cell activation to synergize with oHSV**

(A) scRNA-seq UMAP plot depicts the treated K7M2 tumor microenvironments. Datasets from all treatment groups were merged with no need for batch correction. (B) Bar plot displays the normalized enrichment score (NES) of the significant KEGG pathways from gene set enrichment analysis in NK and CD8 T cells from the tumor micro-environment. (C) FACS of tumor-infiltrating immune cells showed decreased immunosuppressive cells and increased activated T cells post-treatment. The  $p$  values calculated via one-way ANOVA with Dunnett's multiple comparisons test are shown (wherein each treatment cohort was compared with the combination cohort). Error bars depict mean  $\pm$  SEM. (D) Violin plots show increased cytotoxic gene expression in all NK and T cells of combination-treated K7M2 (arrow indicates control for comparison, percent change =  $100 \times (2^{\log_2 \text{FC}} - 1)$ ). All treatment comparisons with a percent change value over 20% were statistically significant with  $p$ -adjusted  $\leq 0.01$ . PBS and oHSV ( $1.0 \times 10^8$  pfu) were given i.Tu. on days 0 and 2. Trabectedin (0.15 mg/kg) was given i.v. on day 0. scRNA-seq samples were collected on day 3. Flow cytometry samples were collected on day 7.

level, we noted that a significant increase in antitumor GP70<sup>+</sup> and infection-related TIM3<sup>+</sup> CD8 T cell numbers occurred in combination-treated tumors, despite no significant combinatorial increase in overall CD8 or NK cell counts ( $p \leq 0.05$ ; Figures 4C, S7A, and S7B). We also observed a decrease in immunosuppressive cells, including CD206<sup>hi</sup> tumor-associated macrophages (TAM), T regulatory cells, and CTLA4<sup>+</sup> CD4 T cells, following treatment (Figure 4C).

To investigate whether these patterns of enriched effector lymphocytes and decreased suppressive cells correlated with an activation of effector lymphocytes, we isolated NK and T cells from the scRNA-seq datasets and probed for phenotypic changes between treatment groups. We found that trabectedin stimulated the expression of all granzyme (*Gzm*) genes, markers of cytotoxic activation (Figure 4D). Perforin (*Prf1*) expression was maintained across treatment groups. The combinatorial therapy also enhanced the potential activation of dendritic cells through increased expression of *Xcl1* by NK cells, a factor known to facilitate dendritic cell activation of T cells.<sup>35–37</sup> Trabectedin promoted an increase in a cytotoxic lymphocyte phenotype that may induce immune-mediated tumor cell death.

#### **NK and CD8 T cells mediate combination efficacy via trabectedin-stimulated cytotoxicity in immunocompetent models**

We conducted loss-of-function experiments to determine the reliance of combinatorial efficacy on NK or T cells individually. We first analyzed K7M2 osteosarcoma tumor burdens and treatment responses in the immune-compromised (T and B cell-deficient) athymic nude mouse model. We found that the combinatorial efficacy was significantly diminished in this immunodeficient model—only one combination-treated tumor responded (CR + PR = 1/8, 13%; Figures 5A and S1). Similarly, we observed a higher average tumor burden (Figure 5A) than that observed in the immunocompetent K7M2 model (Figure 3A). However, the individual tumor growth curves revealed that the combination-treated tumors progressed slower than their monotherapy-treated counterparts. This maintained, albeit lessened, synergy correlated with a significant survival advantage for the combination-treated nude mice ( $p = 0.0136$ ; Figure S2). A study of F420 in nude mice resulted in similar efficacy outcomes (Figure S5F). These observations suggest a role for T cells in combination-induced regressions; however, the lack of T cells alone was insufficient to completely lose a combinatorial effect.

We next performed antibody-mediated depletion of cytotoxic lymphocytes in treated mice with K7M2 osteosarcoma tumors. To further investigate the role of T cells in treatment efficacy, we depleted CD8 and CD4 T cells individually and concurrently (Figure 5B). Depletion of CD8 T cells conferred a loss of efficacy compared with combination-treated tumors with a complete immune system (CR + PR = 2/7, 29%). When we depleted CD4 T cells but left the CD8 subset intact, combinatorial therapy achieved several maintained complete

responses (CR = 3/6, 50%). Thus, removal of CD4 T cells further increased the combinatorial efficacy. Indeed, when we analyzed the CD4 T cell subset of the scRNA-seq dataset, a large proportion of the infiltrating CD4 T cells possessed a T regulatory cell phenotype (Figures 4A, S6C, and S6D). Finally, the depletion of both CD8 and CD4 T cells maintained initial responses through day 28, although tumors progressed quickly thereafter (PR = 3/6, 50%).

NK cell depletion caused treated animals to lose combinatorial efficacy, indicating that NK cell effector function is critical in the mechanism of oHSV and trabectedin synergy (Figure 5C). In NK-depleted animals, the combinatorial response rate decreased and the average tumor burden increased (CR + PR = 4/8, 50%). This response rate was similar to that of T cell-depleted mice, suggesting that both cell types contribute to oHSV+trabectedin synergy. The role of NK cells in combinatorial efficacy may indicate why mice lacking T cells maintained some combinatorial therapy effects. Thus, an oHSV-stimulated immune infiltration synergized with the trabectedin-mediated increase in cytotoxic NK and T cells to cause tumor regressions in immunocompetent osteosarcoma models.

#### **DISCUSSION**

Herein we report the combination of oHSV and trabectedin demonstrated generalizable synergy across human and mouse preclinical tumor models of pediatric bone sarcomas. Our data support a mechanism where oHSV and trabectedin synergize by enhanced oHSV transcript presence in tumor cells and increased effector lymphocyte cytotoxicity. Trabectedin disrupts the expression of the intrinsic antiviral response within human tumor cells, leading to increased oHSV cellular pathogenesis. Additionally, oHSV increases the intratumoral presence of antitumor (GP70<sup>+</sup>) CD8 T cells and trabectedin stimulates the expression of granzyme genes in NK and T cells to achieve cytotoxic lymphocyte-dependent tumor regressions. Through these synergistic mechanisms, trabectedin amplifies the antitumor activities of oHSV against pediatric bone sarcomas.

oHSV targets tumor cells through two mechanisms—a tumor-specific infection that leads to cell death and immune recruitment and activation against tumor cells. Our studies demonstrate that trabectedin may augment both mechanisms, likely through its ability to bind DNA and disrupt gene expression. While our original rationale for the combination assumed an indirect effect of trabectedin on effector cells via a reduction in immunosuppressive monocytes and macrophages, our results suggest direct and indirect effects. Trabectedin reduced enrichment of the virus-induced intracellular antiviral response in human Ewing sarcoma cells (Figure 2G). This decrease in antiviral expression coincided with an increase in intracellular oHSV transcript prevalence and abundance, which could occur through a number of different mechanisms, including increased oHSV entry and transcript expression under trabectedin treatment. Curiously, the number of infectious oHSV particles did not significantly rise with trabectedin inclusion (Figure 2B). If trabectedin enhances viral entry and transcription through inhibition of the intracellular antiviral response, the lack of increased replicating virus



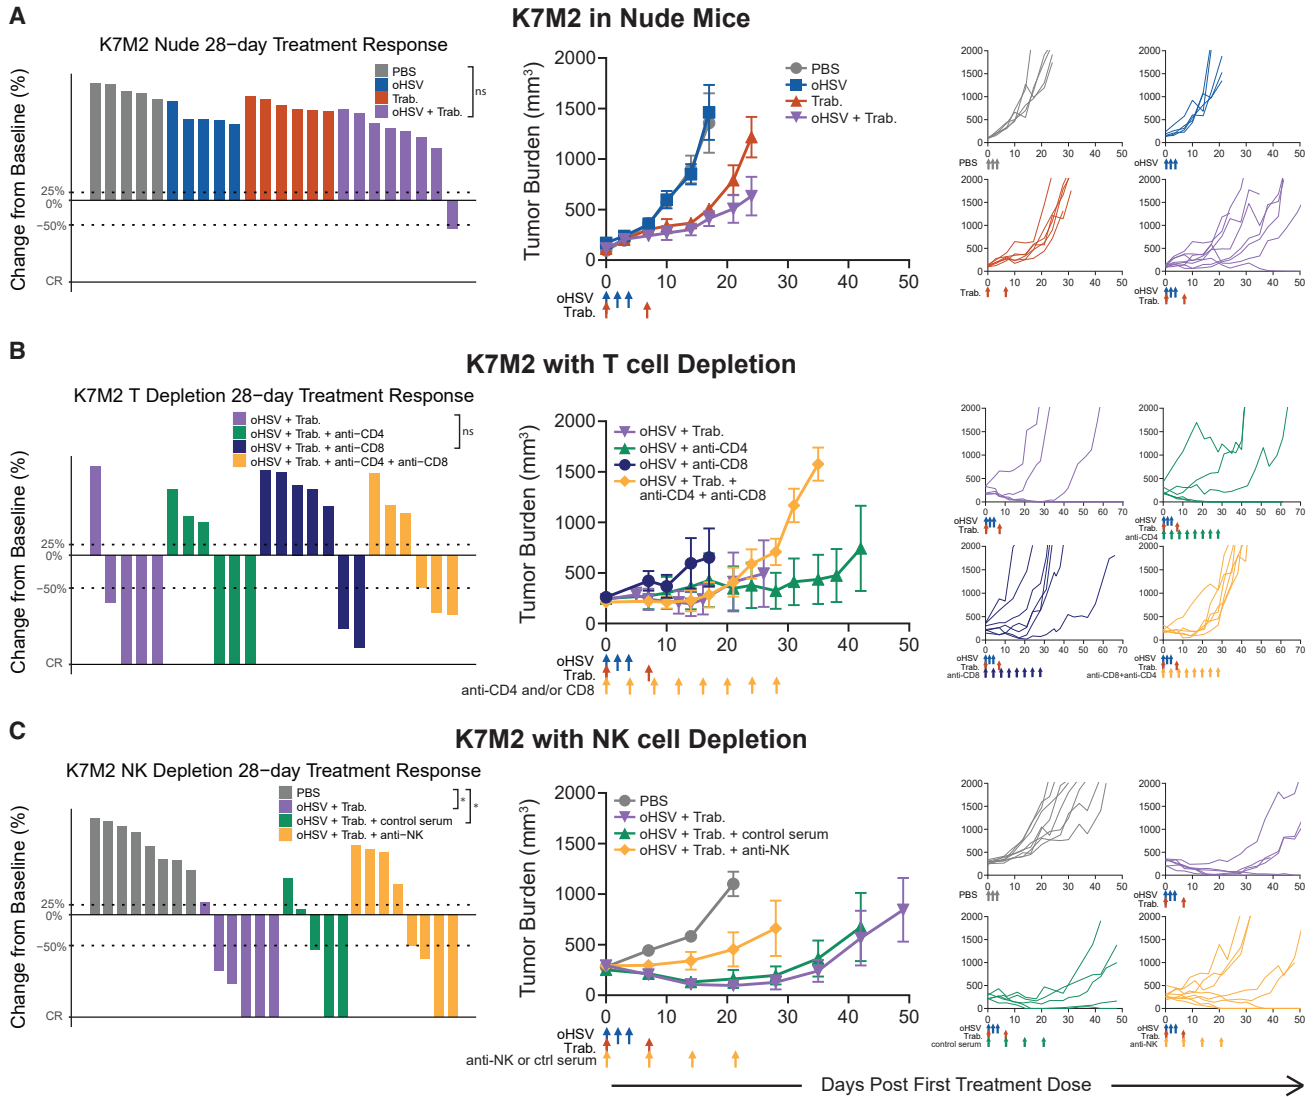

**Figure 5. Combination efficacy in immunocompetent osteosarcoma models results from augmentation of antitumor NK and T cell responses**

The best response for each treated tumor through 28 days, the average tumor burden, and spider plots tracking individual tumor volumes over the full study period are displayed for (A) K7M2 tumor-bearing nude mice (lack T and B cells), (B) K7M2-bearing BALB/c mice treated with antibody-mediated CD4 and CD8 T cell depletion (given i.v. on days 0, 4, 8, 12, 16, 20, 24, and 28), (C) K7M2-bearing BALB/c mice treated with anti-asialo NK cell depletion (given i.v. on days 0, 7, 14, and 21). PBS and oHSV ( $1.0 \times 10^8$  pfu) were given i.Tu. on days 0, 2, and 4. Trabectedin (0.15 mg/kg) was given i.v. on days 0 and 7. Statistical analyses of the disease control rates (CR + PR + SD) were performed using a pairwise Fisher's exact test with  $p$  values adjusted using the Benjamini-Hochberg procedure; \* $p \leq 0.05$ , \*\* $p \leq 0.01$ , \*\*\* $p \leq 0.001$ . Summarized data with error bars depict mean  $\pm$  SEM.

may indicate tumor cell death occurred prior to complete viral replication. This possibility correlates with the tumor regressions observed in combination-treated Ewing sarcoma models. We note that increased intracellular oHSV transcript presence does not exclude the possible transfer of oHSV transcripts by extracellular vesicles.<sup>38,39</sup> However, we maintain that trabectedin increased oHSV transcript intracellular prevalence and abundance and that these effects were associated with tumor regressions. Future work will explore the mechanisms that directly lead to tumor cell death under oHSV+trabectedin combination treatment.

In immunocompetent osteosarcoma, trabectedin increased cytotoxic gene expression in the presence and absence of oHSV, suggesting an effect on NK and T cells despite minimal oHSV-stimulated myeloid recruitment (Figures 4D, S6C, and S6D). While this observation does not exclude the possibility of myeloid targeting by trabectedin, the data indicate possible additional effects on NK and T cell cytotoxicity. Our results are consistent with other studies that reported increased T and NK cell activation and cytotoxicity following trabectedin treatment.<sup>23,40,41</sup> Trabectedin is known to deplete and modulate the immunosuppression of myeloid cells and thereby indirectly lead

to greater antitumor immune activity.<sup>20,22</sup> Outside of an impact to monocytes and macrophages, trabectedin may indirectly enhance NK and T cell activity through signaling resulting from DNA damage and cellular stress in tumor cells.<sup>40</sup> Alternatively, trabectedin may exert a direct effect on NK and T cells through an unexpected mechanism to stimulate cytotoxicity. Given the broad mechanisms of action by trabectedin and the various effects we observed herein, our data are consistent with the notion that a combination of the above mechanisms may activate cytotoxic lymphocytes.

The combination of oHSV and trabectedin achieved complete and partial responses across multiple bone sarcoma models; however, the combination therapy currently lacks the ability to retain ubiquitous sustained responses. Ideally, immunotherapy should induce a sustained adaptive memory response. The deficiency of maintained responses may be due to the treatment regimen length, immune cell exhaustion, or tumors incurring a resistance mechanism such as upregulation of PD-L1, downregulation of MHC-I, or antigen escape. Interestingly, both antitumor GP70<sup>+</sup> CD8 T cells and TIM3<sup>+</sup> CD8 T cells increased 7 days after combination therapy (Figure 4C). TIM3 expression is traditionally associated with exhaustion; thus, CD8 T cell exhaustion may contribute to the recurrence we observed. However, others have demonstrated that TIM3 is expressed on highly functional T cells during acute HSV-1 infection, perhaps indicating CD8 T cell activation in the presence of the oHSV+trabectedin combination therapy.<sup>42</sup> Since depletion studies revealed that CD8 T cells are important for efficacy, these cells are likely not exhausted as early as 7 days post-treatment (Figure 5B). We observed low numbers of infiltrating regulatory or exhausted CD4 T cells in combination-treated tumors at day 7 and CD4 T cell depletion presented similar results to the combination therapy alone (Figures 4C and 5B). Thus, future investigations are necessary to explore whether tumors incur a resistance mechanism or T cell exhaustion occurs at later time points. Whether a treatment cycle at a later time point could be tolerated and effective in extending responses and survival also remains unknown. Discovery of mechanisms that could elevate the combinatorial effects to a sustained adaptive response may further enhance survival and reduce tumor recurrence.

We acknowledge that our preclinical models lack the ability to recapitulate a human patient tumor. We aimed to capture the direct antitumor and immune-mediated aspects of the patient response to the combinatorial therapy by employing human xenograft tumor models in immunodeficient mice to understand the effects on virus infection as well as immunocompetent mouse tumor models to elucidate the impacts on antitumor immunity. Given the lack of a mouse model of Ewing sarcoma, all Ewing sarcoma experiments necessitated implantation of human Ewing sarcoma cells into an immunodeficient mouse.<sup>43</sup> While this enabled us to study the prevalence of oHSV in human Ewing sarcoma cells, we were limited in our ability to study a competent immune response. These models not only lack T and B cells, but NK-tumor interactions may be disrupted due to species-dependent differences in ligand-receptor interactions.<sup>44</sup> In order to better clarify the role of the innate and adaptive immune response to our combinatorial therapy, we employed an immunocompetent

mouse osteosarcoma model. This model was important because NK and T cell interactions may be essential to achieve immune-dependent efficacy. Evidence suggests that NK cells stimulate dendritic cell recruitment and their downstream activation of T cells.<sup>37</sup> The triad of NK cell, dendritic cell, and T cell interactions occurring in an immunocompetent model may be critical for immune-mediated combinatorial efficacy. By using the osteosarcoma syngeneic model, which has both innate and adaptive immunity, we captured the immune-related synergistic mechanisms of oHSV+trabectedin.

It is possible the use of different bone sarcoma models may, in part, determine the effects of the combination therapy. Osteosarcoma may be predisposed to the DNA-damaging effects of trabectedin, which induce stress signals that lead to NK and T cell activation.<sup>41</sup> Ewing sarcomas possess unique sensitivity to trabectedin, since trabectedin targets fusion oncogenes and displays efficacy as a monotherapy in tumors with fusion oncogene dependencies.<sup>26,28</sup> Future work could address these discrepancies through a validation of the combinatorial synergistic mechanisms in additional human and mouse tumor lines and humanized mouse models. Recent strides have been made in developing an immunocompetent Ewing sarcoma model.<sup>45,46</sup> Future investigations would benefit from utilizing such approaches to cohesively capture the tumor intrinsic and immune-dependent mechanisms of oHSV+trabectedin synergy.

Our findings come at an encouraging time in the field, where recent preclinical and clinical results highlight the therapeutic potential for trabectedin. Preclinical and clinical data demonstrated Ewing sarcoma vulnerability to fusion oncogene targeting by trabectedin.<sup>26,28-31,47</sup> These studies and others underscored the clinical relevance of trabectedin against Ewing sarcoma, despite initial challenges to achieve clinical outcomes at lower serum concentrations.<sup>28,32</sup> Indeed, a recent multicenter phase I study of trabectedin as a 1-h infusion in combination with irinotecan in recurrent Ewing sarcoma displayed clinical benefit and safety in pediatric patients, providing rationale for an ongoing phase II study.<sup>33</sup> While trabectedin can induce grades 3 and 4 hepatotoxicity, which we also observed in the C57BL/6 mouse background, the drug is FDA-approved and considered safe in patients, including pediatric patients.<sup>19,31,32</sup> The FDA approval of T-VEC and the evidence of oHSV clinical safety in pediatric patients corroborate the clinical application of oHSV+trabectedin combination therapy.<sup>2,17,18</sup> The combination of trabectedin and oHSV capitalizes on the direct effects of trabectedin on Ewing sarcoma and increases tumor cell stress and immune involvement. A recent phase II clinical trial displaying synergy among T-VEC, trabectedin, and nivolumab in advanced sarcomas supports the synergistic results that we observed and provides further clinical rationale for combining oHSV and trabectedin to treat pediatric patients with bone sarcoma.<sup>48</sup>

Our work demonstrates the synergy of oHSV and trabectedin in preclinical pediatric bone sarcoma models and clarifies the tumor intrinsic and immune-mediated mechanisms whereby trabectedin augments viroimmunotherapy. Our future work will continue to focus on understanding these synergistic mechanisms by examining

the combinatorial effects in additional models of pediatric bone sarcoma and moving toward clinical application. The combination of oHSV and trabectedin could target tumors in pediatric patients and provide further rationale for synergistic combinations, offering a promising opportunity to improve outcomes for children, adolescents, and young adults with bone sarcoma.

## MATERIALS AND METHODS

Our objective of this study was to determine if the enhanced anti-tumor efficacy observed when combining oHSV with trabectedin to treat human Ewing sarcoma xenograft tumor models is generalizable over a panel of patient-derived cell lines, patient-derived xenografts (PDXs), and immunocompetent murine tumor models using oHSV variants. We aimed to elucidate the mechanisms of synergy in both immunodeficient and immunocompetent tumor models.

### Cell lines and PDXs

#### Cell lines

The A673 human Ewing sarcoma cell line (Cat# CCL-81), Vero green monkey kidney cell line (Cat# CRL-1598), and K7M2 mouse osteosarcoma cell line (Cat# CRL-2836) were purchased from the American Type Culture Collection (ATCC) (Manassas, VA). K7M2 was derived from a spontaneous metastatic lesion in a female BALB/c background.<sup>49</sup> F420 was originally derived from a female C57BL/6 mouse transgenic for a mutant p53 under the control of a bone-selective promoter (kind gift from Jason Yustein).<sup>50</sup> The identities of cell lines were confirmed by short tandem repeat (STR) genotyping. Mycoplasma testing was performed yearly via PCR. A673, K7M2, F420, and Vero cell lines were cultured in Dulbecco's modified Eagle's medium (DMEM) supplemented with 10% fetal bovine serum (FBS), 200 IU/mL penicillin, and 200 µg/mL streptomycin (Gibco brand - Thermo Fisher Scientific, Waltham, MA). New stocks of cell lines were thawed every five to eight passages *in vitro* (approximately 1 month).

#### PDXs

PDXs CHLA258 and EW5 (both Ewing sarcoma) and PDX-0027 (rhabdomyosarcoma) were obtained as frozen vials of tissue fragments (~2 mm × 2 mm) from the Tumor Core at Nationwide Children's Hospital (Columbus, OH). The thawing and surgical implantation of PDX tissues are described in the [animal studies](#) section.

#### Viruses

rRp450 (strain KOS), attenuated by insertion of the rat cytochrome p450 CYP2B1 gene into the viral ribonucleotide reductase ICP6 gene, was provided by E. Antonio Chiocca (Brigham and Women's Hospital, Boston, MA).<sup>51</sup> HSV1716 (strain 17), attenuated by a deletion in RL1 that encodes ICP34.5, was provided by Virttu Biologics (Glasgow, UK; later acquired by Sorrento Therapeutics, San Diego, CA) and maintained and propagated as previously described.<sup>52</sup>

#### Compounds and reagents

Trabectedin was procured from two sources: (1) a generous gift from Janssen Pharmaceutical Companies of Johnson and Johnson (Titus-

ville, NJ) via a materials transfer agreement and (2) purchased from MedChem Express (Monmouth Junction, NJ). For *in vivo* studies, trabectedin provided by Janssen Pharmaceuticals was formulated at 0.0375 mg/mL in sterile purified water. Trabectedin purchased from MedChem Express was dissolved in DMSO at 4 mg/mL and stored at -20°C. On the day of injection, trabectedin was thawed and formulated in 0.1 g of Hydroxy B-Cyclodextrin (Sigma-Aldrich, St. Louis, MO, MKBL6868V) and sterile PBS at 0.0533 mg/mL. For all studies, trabectedin was injected in a final volume of 100 µL per mouse at 0.15 mg/kg. Dexamethasone was purchased at 4 mg/mL from Mylan Pharmaceuticals (Morgantown, WV) and diluted in PBS. Lyophilized anti-asialo GM1 antibody (anti-NK) in normal rabbit serum was obtained from FujiFilm Wako Pure Chemical (Richmond, VA) and dissolved in 1 mL sterile distilled water. Frozen sterile normal rabbit serum was acquired from Thermo Fisher Scientific.

### Animal studies

All animal studies were approved by the Nationwide Children's Hospital Institutional Animal Care and Use Committee under protocols AR12-00074 and AR19-00116.

#### Mice

Athymic nude (Hsd:Athymic Nude-Foxn1<sup>tmu</sup>), BALB/c (BALB/cAnNHsd), C57BL/6, and B6-albino (B6(Cg)-Tyrc-2J/J) female mice were purchased from Envigo (Indianapolis, IN). CB17 (Scid C.B-Igh-1<sup>b</sup>/IcrTac-Prkdc<sup>scid</sup>) female mice were purchased from Taconic (Germantown, NY). NSG-SGM3 (NOD.Cg-Prkdc<sup>scid</sup> Il2rg<sup>tm1Wjl</sup>) Tg(CMV-IL3,CSF2,KITLG)1Eav/MloySzj) female mice were purchased from Jackson Labs (Bar Harbor, ME). All mice arrived at 4–5 weeks of age and were enrolled in animal studies at 6–8 weeks of age. Humane endpoints included a tumor volume of 2000 mm<sup>3</sup>, a tumor length of 2 cm, 20% weight loss, treatment-related ulceration (>1 cm) or blistering/necrosis, or a body condition score of less than 2. Mice that reached a non-tumor-related endpoint prior to sufficient data collection (2.5 weeks) were excluded from the study.

#### PDX tumor models in immunodeficient mice

After thawing frozen vials at 37°C, the PDX tumor cell line A673 was passaged at least twice in culture to reach exponential phase and then implanted by simple subcutaneous injection (5.0 × 10<sup>6</sup> A673 tumor cells) in the right flank of female athymic nude mice. PDX tissue fragments were thawed and immediately rinsed with warm DMEM (37°C) and surgically implanted subcutaneously (2 × 2 mm<sup>3</sup> tumor fragment) in the right flank of CB17S (PDX-0027) or athymic nude mice (CHLA258, EW5). Tumors derived from the PDX tissue fragments were allowed to grow to a volume of ~1,800 mm<sup>3</sup> and then donor mice were humanely euthanized. After the tumors derived from PDX tissues were harvested and diced into 2 × 2 mm<sup>3</sup> tumor fragments, these fresh tumor fragments were surgically implanted subcutaneously in the right flank of CB17S (PDX-0027) or athymic nude (CHLA258, EW5) female mice. Both PDX cell line-derived and PDX tissue-derived tumors were allowed to reach ~200 mm<sup>3</sup> prior to enrollment into the efficacy studies. Mice bearing PDX

tumors were then treated with trabectedin intravenously (i.v.) by tail vein injection (days 0 and 7). rRp450 or HSV1716 was diluted in PBS to  $1.0 \times 10^7$  plaque-forming units (pfu)/mL per mouse (each mouse receiving 100  $\mu$ L) and administered intratumorally (i.Tu.) on days 0 and 2. PBS (100  $\mu$ L per mouse) was administered i.Tu. as the control for rRp450 or HSV1716 (days 0 and 2).

#### **Murine tumor models in immunocompetent mice**

After thawing, F420 or K7M2 tumor cell lines were passaged at least twice in culture to reach exponential phase prior to implantation. F420 (derived from female C57BL/6 mice) was implanted in either C57BL/6 or B6-albino (C57BL/6 background) female mice and K7M2 (derived from female BALB/c) was implanted in female BALB/c or athymic nude (BALB/c background) mice. F420 was implanted in the right flank by simple subcutaneous injection ( $5.0 \times 10^6$  tumor cells). K7M2 was initially implanted in the right flank of female athymic nude mice by simple subcutaneous injection ( $2.5 \times 10^6$  tumor cells). To enhance K7M2 growth, K7M2 tumors were allowed to grow to a volume of  $\sim 1,800$  mm<sup>3</sup> and then donor mice were humanely euthanized. After the large K7M2 tumors were harvested and diced into  $2 \times 2$ -mm<sup>3</sup> tumor fragments, these tumor fragments were surgically implanted subcutaneously in the right flank of female BALB/c mice. These mice then entered studies or became K7M2 donor mice for future studies. Efforts were made to keep tumor passages in the immunocompetent BALB/c mice low and to use tumor passages within several months on the same study. Then, mice bearing F420 or K7M2 flank tumors ( $\sim 150$ – $300$  mm<sup>3</sup>) were treated with trabectedin i.v. by tail vein injection or retro-orbital injection (days 0 and 7). HSV1716 was diluted in PBS to  $1.0 \times 10^8$  pfu/mL per mouse (each mouse receiving 100  $\mu$ L) and administered i.Tu. (days 0, 2, and 4). PBS (100  $\mu$ L per mouse) was administered i.Tu. as the control for HSV1716 (days 0, 2, and 4).

#### **Murine tumor models in immunodeficient mice**

K7M2 tumor cell lines were passaged at least twice in culture to reach exponential phase and then implanted by simple subcutaneous injection ( $2.5 \times 10^6$  tumor cells) in the right flank of female athymic nude mice. Athymic nude mice bearing K7M2 flank tumors ( $150$ – $200$  mm<sup>3</sup>) were then treated with trabectedin i.v. by retro-orbital injection (days 0 and 7). HSV1716 was diluted in PBS to  $1.0 \times 10^8$  pfu/mL per mouse (each mouse receiving 100  $\mu$ L) and administered i.Tu. (days 0, 2, and 4). PBS (100  $\mu$ L per mouse) was administered i.Tu. as the control for HSV1716 (days 0, 2, and 4).

#### **oHSV replication studies**

A673 xenograft tumors from mice treated with HSV1716 or HSV1716+Trabectedin regimens previously described were harvested at 72 h and 144 h after infection. Tumors were homogenized and subjected to three cycles of freezing and thawing before a 5–8 log serial dilution in 10% FBS DMEM and an inoculation of a 90% confluent 12-well plate of Vero cells. The virus was applied for 2 h before adding overlay media (1% carboxymethylcellulose [CMC], 1x MEM, 10% FBS) and incubating in a 37°C incubator for 2 days. Plates were stained in crystal violet for 20 min, washed in tap water, and dried

overnight. Viral plaques were counted and multiplied by serial dilution to determine viral titer (pfu).

#### **Single-cell RNA sequencing**

A673 ( $n = 8$ ) and K7M2 ( $n = 4$ , bi-flank) tumors were implanted into the flanks of athymic nude and BALB/c mice, respectively, according to the methods described above for each model. Mice bearing tumors  $\sim 300$ – $500$  mm<sup>3</sup> were selected for the scRNA-seq experiments. Mice were given trabectedin i.v. by tail vein injection (day 0). HSV1716 was diluted in PBS to  $1.0 \times 10^7$  pfu/mL (A673) or  $1.0 \times 10^8$  pfu/mL (K7M2) per mouse (each mouse received 100  $\mu$ L) and administered i.Tu. on days 0 and 2. PBS (100  $\mu$ L per mouse) was administered i.Tu. on days 0 and 2.

To create single-cell suspensions, tumors were harvested from mice on day 3 and separately dissociated on a GentleMacs Octo Dissociator with Heaters (Miltenyi Biotec, Bergisch Gladbach, Germany, 130-096-427) using the human tumor dissociation kit (Miltenyi Biotec, 130-095-929). Dead cells were removed using the dead cell removal kit (Miltenyi Biotec, 130-090-101) per the manufacturer's protocol. Viable single-cell suspensions were resuspended in 0.04% BSA in PBS (Sigma-Aldrich, A1595-50ML and Gibco, 21-031-CV) and loaded onto the Chromium Next GEM Chip G Single Cell Kit (10 $\times$  Genomics, PN-1000120) at the appropriate volume required to target 5,000–8,000 cells per sample. Final libraries were loaded onto an Illumina NovaSeq 6000 sequencer to generate a minimum of 65 million reads per sample.

#### **CD4+ and CD8+ cell depletion with monoclonal antibodies**

To deplete CD4<sup>+</sup> and/or CD8<sup>+</sup> lymphocytes, K7M2-bearing female BALB/c mice were established as described above for the efficacy studies and then administered intraperitoneal (i.p.) injections of 250  $\mu$ g of anti-CD4 antibody (GK1.5), 250  $\mu$ g of anti-CD8 antibody (YTS169.4), or both at 250  $\mu$ g of anti-CD4 and CD8 antibodies (days 0, 4, 8, 12, 16, 20, 24, and 28). Mice were injected i.Tu. with either 100  $\mu$ L of PBS (control) or  $1.0 \times 10^8$  pfu HSV1716 in 100  $\mu$ L of PBS on days 0, 2, and 4. Trabectedin was administered i.v. by retro-orbital injection on days 0 and 7. The oHSV+trabectedin cohort was derived from a later K7M2 tumor passage than the T cell-depleted cohorts, but shared the same initial athymic nude donor cohort.

#### **NK cell depletion with anti-asialo GM1**

To deplete NK cells, K7M2-bearing female BALB/c mice were established as described above in the efficacy studies and then administered i.p. injections of 50  $\mu$ L anti-asialo GM1 antibody (FujiFilm Wako Pure Chemical, Richmond, VA) or control rabbit serum (Thermo Fisher Scientific) on days 0, 7, 14 and 21. Mice were injected i.Tu. with either 100  $\mu$ L of PBS (control) or  $1.0 \times 10^8$  pfu HSV1716 in 100  $\mu$ L of PBS on days 0, 2, and 4. Trabectedin was administered i.v. by retro-orbital injection on days 0 and 7.

#### **Fluorescence-activated cell sorting analysis**

K7M2 tumors ( $\sim 400$  mm<sup>3</sup>) were established in BALB/c mice as described in the efficacy studies. Mice were then treated with



trabectedin i.v. by retro-orbital injection (day 0). HSV1716 was diluted in PBS to  $1.0 \times 10^8$  pfu/mL per mouse and administered i.Tu., as previously described (days 0, 2, and 4). PBS was administered i.Tu. as the control for HSV1716, as previously described (days 0, 2, and 4). Animals were then euthanized on day 7 and whole tumors collected and transferred into six-well dishes with 2 mL 1x PBS. Samples were minced by mechanical chopping and incubated in 1x PBS containing 150 mg/mL DNase I (Roche Diagnostics, Indianapolis, IN) and 25 mg/mL liberase (Roche Diagnostics) at 37°C for 1 h. Tumor samples were then filtered through 70- $\mu$ m cell strainers (Thermo Fisher Scientific). Single-cell suspensions were spun down and tumor cells were lysed with ACK RBC lysis buffer (Lonza Group, Basel, Switzerland) at room temperature for 5 min. Tumor cells were washed with 1x PBS and blocked with 5% mouse Fc blocking reagent (Biolegend, San Diego, CA) in FACS buffer (1% FBS and 1 mM EDTA in PBS) on ice for 30 min.

Tumor samples were labeled on ice for 30 min with one of the following antibody staining panels. All of the following flow cytometry antibodies were purchased from BioLegend (San Diego, CA) except for anti-CD25 (BD Biosciences, San Jose, CA), anti-Ly6C (BD Biosciences), and anti-Foxp3 (eBiosciences, San Diego, CA). For NK and lymphocytes: CD4-fluorescein isothiocyanate (FITC) (GK1.5), CD49b-phycoerythrin (PE) (DX5), CD8a-PE-Cy7 (53-6.7), B220-PerCP/Cy5.5 (RA3-6B2), CD44-allophycocyanin (APC) (IM7), and CD3e-Violet 421 (145-2C11). For T cell exhaustion markers: CD4-FITC, CD8a-PE-Cy7, B220-PerCP/Cy5.5, and CD3e-Violet 421 together with LAG3-PE (C9B7W) and Tim3-APC (RMT3-23) or CTLA4-PE (UC10-4B9) and PD-1-APC (29F.1A12). For myeloid cells: CD11b-Violet 421 (M1/70), F4/80-PE-Cy7 (BM8), Ly6C-APC (AL-21), Ly-6G-APC-Cy7 (1A8); for GP70<sup>+</sup> CD8 T cells: GP70-TETRAMER-APC, mouse MuLV gp70 env 423 SPSYVYHQF, obtained from the NIH tetramer core facility (Human B2M H-2Ld). Labeled cells were washed with FACS buffer and fixed in 1% paraformaldehyde (Thermo Scientific Chemicals brand – Thermo Fisher Scientific) on ice for 5 min. CD25<sup>+</sup>Foxp3<sup>+</sup> T regulatory cells were identified using intracellular staining. Mononuclear cells were enriched using Percoll (GE Healthcare, Little Chalfont, United Kingdom) density gradient centrifugation. Tumor single-cell suspensions were spun down. Cell pellets were suspended in 5 mL of 44% Percoll and gradually loaded on top of 3 mL of 67% Percoll in a 15-mL tube. Sample tubes were spun at  $500 \times g$  without brake at room temperature for 20 min. The interface cells between 44% and 67% Percoll were collected. Mononuclear cells were washed with FACS buffer and blocked with 5% mouse Fc blocking reagent in FACS buffer. Cells were stained with CD4-APC, CD8-PE-Cy7, CD25-PE, CD49b-PerCP, B220-APC-CY7, and CD3e-Violet 421 on ice for 30 min followed by Foxp3-FITC (FJK-16s) intracellular staining using cell fixation and cell permeabilization kit (Invitrogen). Stained cells were fixed in 1% paraformaldehyde. Data were collected on a BD FACS LSR II (BD Biosciences) and results were analyzed using the FlowJo software, version 10.0.3 (Tree Star Inc.).

### Animal studies analysis and plot generation

Best overall response rates for each experiment were calculated within the treatment response period of 28 days using R. The following definitions were used: complete response (CR) – any tumor volume  $\leq 0.10 \text{ mm}^3$  for at least one time point, partial response (PR) – relative tumor volume  $\leq 0.5$  for at least one time point, stable disease (SD) – does not meet the above definitions and has a relative tumor burden  $\leq 1.25$  at 28 days, progressive disease (PD) – does not meet the above definitions (relative tumor burden  $>1.25$  by 28 days). Relative tumor volume was defined as tumor volume divided by the initial tumor volume. The ggplot package was used to depict the relative tumor burden of the best overall response for each treated tumor. GraphPad Prism v7.0 was used to plot the average tumor burdens ( $\text{mm}^3$ ), individual tumor burdens ( $\text{mm}^3$ ), and individual weights (g) for each treatment group. Once a mouse reached endpoint, plotting of the curve for that treatment group (for average tumor burden) or individual tumor burden ceased. GraphPad Prism v7.0 was also used to plot survival curves, cellular infiltrates, cytokine levels, toxicology factors of interest, and histological scoring.

### Single-cell RNA sequencing analysis and tools

#### Ewing sarcoma samples

Initial raw data processing, reference alignment, and feature-barcode matrix construction was performed via Cell Ranger (version 3.0.2, 10x Genomics) with reads mapped to the mm10 mouse genome (GCF\_000001635.20), hg19 human genome (GCF\_000001405.13), and HSV-1 strain 17 genome (GCF\_000859985.2) references. The count outputs were loaded into Seurat R toolkit V4 for further processing and analysis.<sup>53</sup> The rrrSingleCellUtils package was used for early processing, quality control, and UMAP plots ([github.com/kids-cancerlab/rrrSingleCellUtils](https://github.com/kids-cancerlab/rrrSingleCellUtils)). Seurat quality control cutoffs were optimized for each sample, but cells with less than 800 RNA counts or greater than 40% mitochondrial reads were always omitted. Human cells (tumor cells) were isolated. All datasets were annotated, merged, and subsequently normalized (Seurat). Batch correction was not necessary. Principal-component analysis, UMAP dimensional reduction, and unsupervised clustering (“RunPCA”, “FindNeighbors”, “FindClusters”, “RunUMAP”) were performed using Seurat. Differentially expressed genes and fold change (log2FC) values were identified using “FindMarkers” and “FoldChange” (Seurat, wilcox). HSV transcripts and the cells containing them were identified and visualized using “DimPlot”, and “VlnPlot” (Seurat, rrrSingleCellUtils). Module scores were calculated using the “AddModuleScore” function (Seurat) using HSV time point-dependent gene lists. Module scores were visualized with “FeaturePlot” and “VlnPlot” (Seurat, rrrSingleCellUtils). The clusterProfiler R package was used to perform gene set enrichment analysis using KEGG gene sets and the enrichplot R package provided the plotting via “gseaplot” for the “Herpes simplex virus 1 infection” KEGG gene set.<sup>54,55</sup> The pathview package was used to depict the pathway of the “Herpes simplex virus 1 infection” KEGG gene set and the upregulated or downregulated genes within the pathway. The pathway results were summarized and depicted herein using [Biorender.com](https://biorender.com). Percent increases in expression between groups were calculated from log2FC values using

$x\% = 100 \times (2^{\log_2FC} - 1)$ . Percent decreases in expression between groups were calculated from  $\log_2FC$  values using  $x\% = 100 \times (1 - 2^{\log_2FC})$ . The ggplot2 package generically assisted with plot generation in R.

### Osteosarcoma samples

Initial raw data processing, reference alignment, and feature-barcode matrix construction was performed using Cell Ranger (version 7.0.0, 10× Genomics) with reads mapped to the mm10 mouse genome (GCF\_000001635.20), hg19 human genome (GCF\_000001405.13), and HSV-1 strain 17 genome (GCF\_000859985.2) references. As above, the count outputs were loaded into Seurat R toolkit V4 for further processing and analysis and the rrrSingleCellUtils package was used for early processing, quality control, and UMAP plots. Seurat quality control cutoffs were optimized for each sample (individual cutoffs available with code on GitHub), but cells with less than 800 RNA counts or greater than 20% mitochondrial reads were omitted. All datasets were annotated, merged, and subsequently normalized (Seurat). Batch correction was not necessary. Principal-component analysis, UMAP dimensional reduction, and unsupervised clustering (“RunPCA”, “FindNeighbors”, “FindClusters”, “RunUMAP”) were performed using Seurat. Unsupervised recursive sub-clustering was performed. Differentially expressed genes and fold change ( $\log_2FC$ ) values were identified using the wilcox method for “FindMarkers” and “FoldChange” (Seurat). Percent decreases in expression between groups were calculated from  $\log_2FC$  values using  $x\% = 100 \times (1 - 2^{\log_2FC})$ . Percent increases in expression between groups were calculated from  $\log_2FC$  values using  $x\% = 100 \times (2^{\log_2FC} - 1)$ . Cell type assignment was informed by SingleR assignment via the celldex references “MouseRNAseqData” (bulk RNA-seq mouse reference) and “ImmGenData” (mouse immune reference).<sup>56–58</sup> The reference annotation, recursive sub-cluster assignments, and most differentially expressed genes for each cluster (“FindMarkers”) were used to assign cell types. The clusterProfiler R package was used to perform gene set enrichment analysis using KEGG gene sets and the enrichplot R package was used to depict the top significantly enriched results. The ggplot2 package assisted with plot generation.

### Statistical analysis

Statistical tests were run using R or GraphPad Prism v7.0. Disease stabilization rates between groups underwent a pairwise Fisher’s exact test with  $p$  values adjusted using the Benjamini-Hochberg procedure to determine significant differences between treatment groups. Summarized data with error bars depict mean  $\pm$  SEM. Survival studies were analyzed using the Mantel-Cox log-rank test. Otherwise, the comparison of samples with normal distribution was analyzed using Student’s unpaired  $t$  test and the difference among group means was determined via ANOVA with the Dunnett’s multiple comparisons test utilized when comparing treatment cohorts to the combination cohort. Significant differences in sample groups were determined by  $p \leq 0.05$ .

### DATA AND CODE AVAILABILITY

The code utilized for the scRNA-seq and response rate analyses herein is available on <https://github.com/kidcancerlab/oHSV-trabectedin>. scRNA-seq data generated for this

manuscript are deposited on the Gene Expression Omnibus (GEO) of the National Center for Biotechnology Information (NCBI) under accession number GSE260551.

### ACKNOWLEDGMENTS

This work was generously supported by funding provided by the NIH/NCI, including the National Cancer Institute Cancer Moonshot Award U54CA232561, F31CA278353, T32CA269052, as well as by a CancerFree KIDS Foundation New Idea Award, a St. Baldrick’s Foundation Research Grant Award, the Pelotonia Institute of Immuno-Oncology, the Nationwide Children’s Director’s Strategic Development Fund, and NIH Clinical Translational Science Awards (CTSA) Grant UL1TR002733. The content is solely the responsibility of the authors and does not necessarily represent the official views of our funding sources. We thank the Nationwide Children’s Hospital Tumor Core, Morphology Core, and the Steve and Cindy Rasmussen Institute for Genomic Medicine for their contributions to this work. BioRender.com was used to create the schemas within this manuscript.

### AUTHOR CONTRIBUTIONS

T.P.C., M.A.C., E.M.R., and R.D.R. conceived, designed, and directed the research and methodology. T.P.C. and R.D.R. were co-advisors of E.M.R. on this project. D.A.L., E.M.R., P.R., E.S., and W.E.C. contributed to the conceptual development and evolution of the research. M.A.C., A.M.G., and E.M.R. performed animal studies. C.-Y.C. performed flow cytometry analyses. L.B. provided reagents for the depletion studies. P.-Y.W. determined the scRNA-seq collection time point. M.C. and A.C.G. prepared next-generation sequencing libraries. E.M.R., M.V.C., and M.G. performed computational analyses. E.M.R., M.V.C., and R.D.R. reviewed computational analyses. L.E.B. stained and read immunohistochemistry slides. E.M.R. interpreted the consolidated data and wrote the manuscript. E.M.R., T.P.C., R.D.R., M.A.C., A.M.G., C.-Y.C., M.V.C., M.C., A.C.G., M.G., P.-Y.W., L.B., E.S., P.R., L.E.B., D.A.L., E.R.M., and W.E.C. edited the manuscript. E.M.R. revised the manuscript. All authors read and approved the final manuscript.

### DECLARATION OF INTERESTS

L.B. is an employee of JJP Biologics. T.P.C. is a member of the Molecular Therapy editorial board and the editor-in-chief of *Molecular Therapy Oncology*. D.A.L. and P.R. are associate editors for *Molecular Therapy Oncology*.

### SUPPLEMENTAL INFORMATION

Supplemental information can be found online at <https://doi.org/10.1016/j.omton.2024.200886>.

### REFERENCES

- Andtbacka, R.H.I., Kaufman, H.L., Collichio, F., Amatruda, T., Senzer, N., Chesney, J., Delman, K.A., Spittle, L.E., Puzanov, I., Agarwala, S.S., et al. (2015). Talimogene Laherparepvec Improves Durable Response Rate in Patients With Advanced Melanoma. *J. Clin. Oncol.* 33, 2780–2788. <https://doi.org/10.1200/jco.2014.58.3377>.
- Haitz, K., Khosravi, H., Lin, J.Y., Menge, T., and Nambudiri, V.E. (2020). Review of talimogene laherparepvec: A first-in-class oncolytic viral treatment of advanced melanoma. *J. Am. Acad. Dermatol.* 83, 189–196. <https://doi.org/10.1016/j.jaad.2020.01.039>.
- Shalhout, S.Z., Miller, D.M., Emerick, K.S., and Kaufman, H.L. (2023). Therapy with oncolytic viruses: progress and challenges. *Nat. Rev. Clin. Oncol.* 20, 160–177. <https://doi.org/10.1038/s41571-022-00719-w>.
- Lin, D., Shen, Y., and Liang, T. (2023). Oncolytic virotherapy: basic principles, recent advances and future directions. *Signal Transduct. Targeted Ther.* 8, 156. <https://doi.org/10.1038/s41392-023-01407-6>.
- Daw, N.C., Chou, A.J., Jaffe, N., Rao, B.N., Billups, C.A., Rodriguez-Galindo, C., Meyers, P.A., and Huh, W.W. (2015). Recurrent osteosarcoma with a single pulmonary metastasis: a multi-institutional review. *Br. J. Cancer* 112, 278–282. <https://doi.org/10.1038/bjc.2014.585>.
- Van Mater, D., and Wagner, L. (2019). Management of recurrent Ewing sarcoma: challenges and approaches. *OncoTargets Ther.* 12, 2279–2288. <https://doi.org/10.2147/OTT.S170585>.

7. Hamilton, S.N., Carlson, R., Hasan, H., Rassekh, S.R., and Goddard, K. (2017). Long-term Outcomes and Complications in Pediatric Ewing Sarcoma. *Am. J. Clin. Oncol.* *40*, 423–428. <https://doi.org/10.1097/COC.000000000000176>.
8. Dorfman, H.D., and Czerniak, B. (1995). Bone cancers. *Cancer* *75*, 203–210. [https://doi.org/10.1002/1097-0142\(19950101\)75:1+<203::aid-cnrc2820751308>3.0.co;2-v](https://doi.org/10.1002/1097-0142(19950101)75:1+<203::aid-cnrc2820751308>3.0.co;2-v).
9. Zarghooni, K., Bratke, G., Landgraf, P., Simon, T., Maintz, D., and Eysel, P. (2023). The Diagnosis and Treatment of Osteosarcoma and Ewing's Sarcoma in Children and Adolescents. *Dtsch. Arztebl. Int.* *120*, 405–412. <https://doi.org/10.3238/arztebl.m2023.0079>.
10. Bernstein, M., Kovar, H., Paulussen, M., Randall, R.L., Schuck, A., Teot, L.A., and Juergens, H. (2006). Ewing's sarcoma family of tumors: current management. *Oncol.* *11*, 503–519. <https://doi.org/10.1634/theoncologist.11-5-503>.
11. Durfee, R.A., Mohammed, M., and Luu, H.H. (2016). Review of Osteosarcoma and Current Management. *Rheumatol. Ther.* *3*, 221–243. <https://doi.org/10.1007/s40744-016-0046-y>.
12. Rajan, S., Franz, E.M., McAloney, C.A., Vetter, T.A., Cam, M., Gross, A.C., Taslim, C., Wang, M., Cannon, M.V., Oles, A., and Roberts, R.D. (2023). Osteosarcoma tumors maintain intra-tumoral transcriptional heterogeneity during bone and lung colonization. *BMC Biol.* *21*, 98. <https://doi.org/10.1186/s12915-023-01593-3>.
13. Gross, A.C., Cam, H., Phelps, D.A., Saraf, A.J., Bid, H.K., Cam, M., London, C.A., Winget, S.A., Arnold, M.A., Brandolini, L., et al. (2018). IL-6 and CXCL8 mediate osteosarcoma-lung interactions critical to metastasis. *JCI Insight* *3*, e99791. <https://doi.org/10.1172/jci.insight.99791>.
14. Reinecke, J.B., Gross, A.C., Cam, M., Garcia, L.J., Cannon, M.V., Dries, R., Gryder, B.E., and Roberts, R.D. (2024). Aberrant activation of wound healing programs within the metastatic niche facilitates lung colonization by osteosarcoma cells. Preprint at bioRxiv. <https://doi.org/10.1101/2024.01.10.575008>.
15. Riggi, N., Suvà, M.L., and Stamenkovic, I. (2021). Ewing's Sarcoma. *N. Engl. J. Med. Overseas. Ed.* *384*, 154–164. <https://doi.org/10.1056/NEJMra2028910>.
16. Friedman, G.K., Beierle, E.A., Gillespie, G.Y., Markert, J.M., Waters, A.M., Chen, C.-Y., Denton, N.L., Haworth, K.B., Hutzen, B., Leddon, J.L., et al. (2015). Pediatric cancer gene viral. Part II: potential clinical application of oncolytic herpes simplex virus-1 in children. *Mol. Ther. Oncolytics* *2*, 15016. <https://doi.org/10.1038/mt.2015.16>.
17. Streby, K.A., Geller, J.I., Currier, M.A., Warren, P.S., Racadio, J.M., Towbin, A.J., Vaughan, M.R., Triplet, M., Ott-Napier, K., Dishman, D.J., et al. (2017). Intratumoral Injection of HSV1716, an Oncolytic Herpes Virus, Is Safe and Shows Evidence of Immune Response and Viral Replication in Young Cancer Patients. *Clin. Cancer Res.* *23*, 3566–3574. <https://doi.org/10.1158/1078-0432.CCR-16-2900>.
18. Streby, K.A., Currier, M.A., Triplet, M., Ott, K., Dishman, D.J., Vaughan, M.R., Ranalli, M.A., Setty, B., Skeens, M.A., Whiteside, S., et al. (2019). First-in-Human Intravenous Sphrephvir in Young Cancer Patients: A Phase 1 Clinical Trial. *Mol. Ther.* *27*, 1930–1938. <https://doi.org/10.1016/j.ymthe.2019.08.020>.
19. Barone, A., Chi, D.-C., Theoret, M.R., Chen, H., He, K., Kufrin, D., Helms, W.S., Subramaniam, S., Zhao, H., Patel, A., et al. (2017). FDA Approval Summary: Trabectedin for Unresectable or Metastatic Liposarcoma or Leiomyosarcoma Following an Anthracycline-Containing Regimen. *Clin. Cancer Res.* *23*, 7448–7453. <https://doi.org/10.1158/1078-0432.Ccr-17-0898>.
20. Germano, G., Frapolli, R., Belgiovine, C., Anselmo, A., Pesce, S., Liguori, M., Erba, E., Ubaldi, S., Zucchetti, M., Pasqualini, F., et al. (2013). Role of macrophage targeting in the antitumor activity of trabectedin. *Cancer Cell* *23*, 249–262. <https://doi.org/10.1016/j.ccr.2013.01.008>.
21. D'Incalci, M., Badri, N., Galmarini, C.M., and Allavena, P. (2014). Trabectedin, a drug acting on both cancer cells and the tumour microenvironment. *Br. J. Cancer* *111*, 646–650. <https://doi.org/10.1038/bjc.2014.149>.
22. Banerjee, P., Zhang, R., Ivan, C., Galletti, G., Clise-Dwyer, K., Barbaglio, F., Scarfò, L., Aracil, M., Klein, C., Wierda, W., et al. (2019). Trabectedin Reveals a Strategy of Immunomodulation in Chronic Lymphocytic Leukemia. *Cancer Immunol. Res.* *7*, 2036–2051. <https://doi.org/10.1158/2326-6066.CIR-19-0152>.
23. Belgiovine, C., Frapolli, R., Liguori, M., Digifico, E., Colombo, F.S., Meroni, M., Allavena, P., and D'Incalci, M. (2021). Inhibition of tumor-associated macrophages by trabectedin improves the antitumor adaptive immunity in response to anti-PD-1 therapy. *Eur. J. Immunol.* *51*, 2677–2686. <https://doi.org/10.1002/eji.202149379>.
24. Borgoni, S., Iannello, A., Cutrupi, S., Allavena, P., D'Incalci, M., Novelli, F., and Cappello, P. (2018). Depletion of tumor-associated macrophages switches the epigenetic profile of pancreatic cancer infiltrating T cells and restores their anti-tumor phenotype. *Oncol. Immunology* *7*, e1393596. <https://doi.org/10.1080/2162402x.2017.1393596>.
25. D'Incalci, M., and Galmarini, C.M. (2010). A review of trabectedin (ET-743): a unique mechanism of action. *Mol. Cancer Therapeut.* *9*, 2157–2163. <https://doi.org/10.1158/1535-7163.MCT-10-0263>.
26. Grohar, P.J., Griffin, L.B., Yeung, C., Chen, Q.R., Pommier, Y., Khanna, C., Khan, J., and Helman, L.J. (2011). Ecteinascidin 743 interferes with the activity of EWS-FLI1 in Ewing sarcoma cells. *Neoplasia* *13*, 145–153. <https://doi.org/10.1593/nco.101202>.
27. Grohar, P.J., Segars, L.E., Yeung, C., Pommier, Y., D'Incalci, M., Mendoza, A., and Helman, L.J. (2014). Dual targeting of EWS-FLI1 activity and the associated DNA damage response with trabectedin and SN38 synergistically inhibits Ewing sarcoma cell growth. *Clin. Cancer Res.* *20*, 1190–1203. <https://doi.org/10.1158/1078-0432.CCR-13-0901>.
28. Harlow, M.L., Chasse, M.H., Boguslawski, E.A., Sorensen, K.M., Gedminas, J.M., Kitchen-Goosen, S.M., Rothbart, S.B., Taslim, C., Lessnick, S.L., Peck, A.S., et al. (2019). Trabectedin Inhibits EWS-FLI1 and Evicts SWI/SNF from Chromatin in a Schedule-dependent Manner. *Clin. Cancer Res.* *25*, 3417–3429. <https://doi.org/10.1158/1078-0432.CCR-18-3511>.
29. Hernando-Cubero, J., Sanz-Moncasi, P., Hernández-García, A., Pajares-Bernard, I., and Martínez-Trufero, J. (2016). Metastatic extraskelatal Ewing's sarcoma treated with trabectedin: A case report. *Oncol. Lett.* *12*, 2936–2941. <https://doi.org/10.3892/ol.2016.4950>.
30. Herzog, J., von Klot-Heydenfeldt, F., Jabar, S., Ranft, A., Rossig, C., Dirksen, U., Van den Brande, J., D'Incalci, M., von Luettichau, I., Grohar, P.J., et al. (2016). Trabectedin Followed by Irinotecan Can Stabilize Disease in Advanced Translocation-Positive Sarcomas with Acceptable Toxicity. *Sarcoma* *2016*, 7461783. <https://doi.org/10.1155/2016/7461783>.
31. Lau, L., Supko, J.G., Blaney, S., Hershon, L., Seibel, N., Krailo, M., Qu, W., Malkin, D., Jimeno, J., Bernstein, M., and Baruchel, S. (2005). A phase I and pharmacokinetic study of ecteinascidin-743 (Yondelis) in children with refractory solid tumors. A Children's Oncology Group study. *Clin. Cancer Res.* *11*, 672–677.
32. Baruchel, S., Pappo, A., Krailo, M., Baker, K.S., Wu, B., Villaluna, D., Lee-Scott, M., Adamson, P.C., and Blaney, S.M. (2012). A phase 2 trial of trabectedin in children with recurrent rhabdomyosarcoma, Ewing sarcoma and non-rhabdomyosarcoma soft tissue sarcomas: a report from the Children's Oncology Group. *Eur. J. Cancer* *48*, 579–585. <https://doi.org/10.1016/j.ejca.2011.09.027>.
33. Grohar, P., Ballman, K.V., Heise, R., Glod, J., Wedekind, M.F., Mascarenhas, L., Gedminas, J.M., DuBois, S.G., Maki, R.G., Crompton, B.D., et al. (2023). SARCO37: Results of phase I study of trabectedin given as a 1-hour (h) infusion in combination with low dose irinotecan in relapsed/refractory Ewing sarcoma (ES). *J. Clin. Oncol.* *41*, 11519. [https://doi.org/10.1200/JCO.2023.41.16\\_suppl.11519](https://doi.org/10.1200/JCO.2023.41.16_suppl.11519).
34. Denton, N.L., Chen, C.Y., Hutzen, B., Currier, M.A., Scott, T., Nartker, B., Leddon, J.L., Wang, P.Y., Srinivas, R., Cassady, K.A., et al. (2018). Myelolytic Treatments Enhance Oncolytic Herpes Virotherapy in Models of Ewing Sarcoma by Modulating the Immune Microenvironment. *Mol. Ther. Oncolytics* *11*, 62–74. <https://doi.org/10.1016/j.omto.2018.10.001>.
35. Ghilas, S., Ambrosini, M., Cancel, J.C., Brousse, C., Massé, M., Lelouard, H., Dalod, M., and Crozat, K. (2021). Natural killer cells and dendritic epidermal  $\gamma\delta$  T cells orchestrate type 1 conventional DC spatiotemporal positioning toward CD8(+) T cells. *iScience* *24*, 103059. <https://doi.org/10.1016/j.isci.2021.103059>.
36. Krocze, R.A., and Henn, V. (2012). The Role of XCR1 and its Ligand XCL1 in Antigen Cross-Presentation by Murine and Human Dendritic Cells. *Front. Immunol.* *3*, 14. <https://doi.org/10.3389/fimmu.2012.00014>.
37. Böttcher, J.P., Bonavita, E., Chakravarty, P., Bleses, H., Cabeza-Cabrerizo, M., Sammiceli, S., Rogers, N.C., Sahai, E., Zelenay, S., and Reis e Sousa, C. (2018). NK Cells Stimulate Recruitment of cDC1 into the Tumor Microenvironment Promoting Cancer Immune Control. *Cell* *172*, 1022–1037.e14. <https://doi.org/10.1016/j.cell.2018.01.004>.
38. Kalamvoki, M., and Deschamps, T. (2016). Extracellular vesicles during Herpes Simplex Virus type 1 infection: an inquire. *Virology* *13*, 63. <https://doi.org/10.1186/s12985-016-0518-2>.

39. Kalamvoki, M., Du, T., and Roizman, B. (2014). Cells infected with herpes simplex virus 1 export to uninfected cells exosomes containing STING, viral mRNAs, and microRNAs. *Proc. Natl. Acad. Sci. USA* *111*, E4991–E4996. <https://doi.org/10.1073/pnas.1419338111>.
40. Cucè, M., Gallo Cantafo, M.E., Siciliano, M.A., Riillo, C., Caracciolo, D., Scionti, F., Staropoli, N., Zuccalà, V., Maltese, L., Di Vito, A., et al. (2019). Trabectedin triggers direct and NK-mediated cytotoxicity in multiple myeloma. *J. Hematol. Oncol.* *12*, 32. <https://doi.org/10.1186/s13045-019-0714-9>.
41. Ratti, C., Botti, L., Cancila, V., Galvan, S., Torselli, I., Garofalo, C., Manara, M.C., Bongiovanni, L., Valenti, C.F., Burocchi, A., et al. (2017). Trabectedin Overrides Osteosarcoma Differentiative Block and Reprograms the Tumor Immune Environment Enabling Effective Combination with Immune Checkpoint Inhibitors. *Clin. Cancer Res.* *23*, 5149–5161. <https://doi.org/10.1158/1078-0432.Ccr-16-3186>.
42. Carroll, K.L., Avery, L., Treat, B.R., Kane, L.P., Kinchington, P.R., Hendricks, R.L., and St Leger, A.J. (2020). Differential Expression of Immune Checkpoint Molecules on CD8+ T Cells Specific for Immunodominant and Subdominant Herpes Simplex Virus 1 Epitopes. *J. Virol.* *94*, e01132-19. <https://doi.org/10.1128/jvi.01132-01119>.
43. Ramachandran, B., Rajkumar, T., and Gopisetty, G. (2021). Challenges in modeling EWS-FL11-driven transgenic mouse model for Ewing sarcoma. *Am. J. Transl. Res.* *13*, 12181–12194.
44. Mestas, J., and Hughes, C.C.W. (2004). Of Mice and Not Men: Differences between Mouse and Human Immunology. *J. Immunol.* *172*, 2731–2738. <https://doi.org/10.4049/jimmunol.172.5.2731>.
45. Vasileva, E., Warren, M., Triche, T.J., and Amatruda, J.F. (2022). Dysregulated heparan sulfate proteoglycan metabolism promotes Ewing sarcoma tumor growth. *Elife* *11*, e69734. <https://doi.org/10.7554/eLife.69734>.
46. Daley, J.D., Mukherjee, E.M., Cillo, A.R., Tufino, A.C., Bailey, N.G., Bruno, T.C., McAllister-Lucas, L.M., Vignali, D.A., and Bailey, K.M. (2022). Abstract A004: Radiation-induced changes to the immune microenvironment in an immunocompetent mouse model of Ewing sarcoma. *Clin. Cancer Res.* *28*, A004. <https://doi.org/10.1158/1557-3265.Sarcomas22-a004>.
47. Takahashi, S., Araki, N., Sugiura, H., Ueda, T., Takahashi, M., Morioka, H., Yonemoto, T., Hiraga, H., Hiruma, T., Kunisada, T., et al. (2014). A randomized phase II study comparing trabectedin (T) and best supportive care (BSC) in patients (pts) with translocation-related sarcomas (TRS). *J. Clin. Oncol.* *32*, 10524. [https://doi.org/10.1200/jco.2014.32.15\\_suppl.10524](https://doi.org/10.1200/jco.2014.32.15_suppl.10524).
48. Chawla, S.P., Tellez, W.A., Chomoyan, H., Valencia, C., Ahari, A., Omelchenko, N., Makrievski, S., Brigham, D.A., Chua-Alcala, V., Quon, D., et al. (2023). Activity of TNT: a phase 2 study using talimogene laherparepvec, nivolumab and trabectedin for previously treated patients with advanced sarcomas (NCT# 03886311). *Front. Oncol.* *13*, 1116937. <https://doi.org/10.3389/fonc.2023.1116937>.
49. Khanna, C., Prehn, J., Yeung, C., Caylor, J., Tsokos, M., and Helman, L. (2000). An orthotopic model of murine osteosarcoma with clonally related variants differing in pulmonary metastatic potential. *Clin. Exp. Metastasis* *18*, 261–271. <https://doi.org/10.1023/A:1006767007547>.
50. Zhao, S., Kurenbekova, L., Gao, Y., Roos, A., Creighton, C.J., Rao, P., Hicks, J., Man, T.K., Lau, C., Brown, A.M.C., et al. (2015). NKD2, a negative regulator of Wnt signaling, suppresses tumor growth and metastasis in osteosarcoma. *Oncogene* *34*, 5069–5079. <https://doi.org/10.1038/onc.2014.429>.
51. Chase, M., Chung, R.Y., and Chiocca, E.A. (1998). An oncolytic viral mutant that delivers the CYP2B1 transgene and augments cyclophosphamide chemotherapy. *Nat. Biotechnol.* *16*, 444–448. <https://doi.org/10.1038/nbt0598-444>.
52. Leddon, J.L., Chen, C.Y., Currier, M.A., Wang, P.Y., Jung, F.A., Denton, N.L., Cripe, K.M., Haworth, K.B., Arnold, M.A., Gross, A.C., et al. (2015). Oncolytic HSV virotherapy in murine sarcomas differentially triggers an antitumor T-cell response in the absence of virus permissivity. *Mol. Ther. Oncolytics* *1*, 14010. <https://doi.org/10.1038/mt.2014.10>.
53. Hao, Y., Hao, S., Andersen-Nissen, E., Mauck, W.M., Zheng, S., Butler, A., Lee, M.J., Wilk, A.J., Darby, C., Zager, M., et al. (2021). Integrated analysis of multimodal single-cell data. *Cell* *184*, 3573–3587.e29. <https://doi.org/10.1016/j.cell.2021.04.048>.
54. Wu, T., Hu, E., Xu, S., Chen, M., Guo, P., Dai, Z., Feng, T., Zhou, L., Tang, W., Zhan, L., et al. (2021). clusterProfiler 4.0: A universal enrichment tool for interpreting omics data. *Innovation* *2*, 100141. <https://doi.org/10.1016/j.xinn.2021.100141>.
55. Yu, G., Wang, L.-G., Han, Y., and He, Q.-Y. (2012). clusterProfiler: an R Package for Comparing Biological Themes Among Gene Clusters. *OMICS J. Integr. Biol.* *16*, 284–287. <https://doi.org/10.1089/omi.2011.0118>.
56. Benayoun, B.A., Pollina, E.A., Singh, P.P., Mahmoudi, S., Harel, I., Casey, K.M., Dulken, B.W., Kundaje, A., and Brunet, A. (2019). Remodeling of epigenome and transcriptome landscapes with aging in mice reveals widespread induction of inflammatory responses. *Genome Res.* *29*, 697–709. <https://doi.org/10.1101/gr.240093.118>.
57. Aran, D., Looney, A.P., Liu, L., Wu, E., Fong, V., Hsu, A., Chak, S., Naikawadi, R.P., Wolters, P.J., Abate, A.R., et al. (2019). Reference-based analysis of lung single-cell sequencing reveals a transitional profibrotic macrophage. *Nat. Immunol.* *20*, 163–172. <https://doi.org/10.1038/s41590-018-0276-y>.
58. Heng, T.S.P., Painter, M.W., Immunological Genome Project Consortium, Lukacs-Kornek, V., Mauermann, N., Turley, S.J., Koller, D., Kim, F.S., Wagers, A.J., Asinovski, N., et al. (2008). The Immunological Genome Project: networks of gene expression in immune cells. *Nat. Immunol.* *9*, 1091–1094. <https://doi.org/10.1038/ni1008-1091>.



**Supplemental information**

**Trabectedin promotes oncolytic virus antitumor  
efficacy, viral gene expression, and immune  
effector function in models of bone sarcoma**

**Emily M. Ringwalt, Mark A. Currier, Andrea M. Glaspell, Chun-Yu Chen, Matthew V. Cannon, Maren Cam, Amy C. Gross, Matthew Gust, Pin-Yi Wang, Louis Boon, Laura E. Biederman, Emily Schwarz, Prajwal Rajappa, Dean A. Lee, Elaine R. Mardis, William E. Carson 3rd, Ryan D. Roberts, and Timothy P. Cripe**

## Supplemental Methods

### *scRNAseq Treatment and Collection Determinations (Figure S3)*

A673 tumors were implanted in athymic nude mice and allowed to reach 300-400 mm<sup>3</sup> each (n = 1 per cohort). Mice were treated with trabectedin I.V. by tail vein injection on Day 0. The oHSV C134 was diluted in PBS to 1.0x10<sup>7</sup> pfu/mL per mouse (each mouse receiving 100 µL) and administered via i.Tu. injection. The T1D3-treated mouse received oHSV on Day 0 and the tumor was harvested on Day 3 (T1D3: 1 oHSV treatment, collection 3 days after final treatment). The T2D1-treated mouse received oHSV on Day 0 and 2 and the tumor was harvested on Day 3 (T2D1: 2 oHSV treatments, collection 1 day after final treatment). The T2D3-treated mouse received oHSV on Day 0 and 2 and the tumor was harvested on Day 5 (T2D5: 2 oHSV treatments, collection 3 days after final treatment). One mouse remained untreated as an untreated control and the tumor was harvested on Day 3. Following tumor collection from treated mice and subsequent disassociation, microscopy of the cells stained with DAPI was used to determine the live cell counts for each scRNAseq preparation. Cellular infiltrate levels were determined from FACS analysis of each tumor collection.

### *Toxicity Studies (Figure S5)*

In an attempt to combat the toxicity observed in tumor-bearing C57BL/6 mice yet maintain efficacy, further efficacy studies in the F420 tumor model included variation on trabectedin dosing. The treatment cohorts were tested with a single dose of trabectedin treatment I.V. (0.15 mg/kg) on Day 0 in F420 tumor-bearing B6-albino mice. Trabectedin dose de-escalation was also performed in F420 tumor-bearing B6-albino mice, using the regimen described above with the following treatment groups: HSV1716 (1.0 x10<sup>8</sup> pfu) + trabectedin (0.075 mg/kg, I.V.), HSV1716 (1.0 x10<sup>8</sup> pfu) + trabectedin (0.0375 mg/kg, I.V.), HSV1716 (1.0 x10<sup>8</sup> pfu) + trabectedin (0.0188 mg/kg, I.V.), HSV1716 (1.0 x10<sup>8</sup> pfu) + trabectedin (0.0094 mg/kg, I.V.), HSV1716 (1.0 x10<sup>8</sup> pfu) + trabectedin (0.0047 mg/kg, I.V.). Additionally, fragmented trabectedin dosing was used to mitigate the observed toxicity. The same regimen of oHSV and PBS as in the original efficacy was utilized, but trabectedin was administered I.V. on Days 0, 2, 4, 6, 8 at 0.05 mg/kg in B6-albino mice. Finally, the addition of steroid treatment (dexamethasone) to each of the above cohorts aimed to lower the toxic effects observed with trabectedin in the C57BL/6 and B6-albino mice. Dexamethasone was administered via intraperitoneal (IP) injection at 40 mg/kg in vf = 250 mL (Days -1, -2, 5, and 6).

To assess the exacerbated toxic effect of trabectedin when combined with oHSV in C57BL/6 and B6-albino mice, F420 tumors (~200 mm<sup>3</sup>) were established in B6-albino mice and treated as described in the efficacy studies, except with only one trabectedin treatment (Day 0). Animals were subjected to exsanguination with euthanasia being confirmed by cervical dislocation on Days 3 and 6 for cytokine analysis and Days 3 and 7 for serum chemistry for blood chemistry and tissue histology. Blood was collected in serum-separating tubes (Becton Dickinson, San Jose, CA) and allowed to clot at room temperature for 20 minutes. The clotted blood was then centrifuged at >2000xg for 20 minutes at room temperature. After collecting the supernatant (serum) and storing at -80°C, the frozen serum samples were shipped to IDEXX BioAnalytics (North Grafton, MA) for analysis on a Mouse Cytokine 25-Panel (62579) and a Standard Toxicology Panel (62794). Liver, lung, brain, and tumor were harvested for histopathology examination. Harvested tissues were fixed for 24 hours in 10% buffered formalin (Thermo Fisher Scientific), placed in tissue cassettes, and then transferred to 70% ethanol for 24 hours. Fixed tissues were paraffin-embedded by the Morphology Core at Nationwide Children's Hospital (Columbus, OH). Cutting of serial sections of tissues, hematoxylin and eosin staining, and histopathological evaluations by a licensed veterinary pathologist were performed by IDEXX BioAnalytics. Further histological analysis of tissues was performed at Nationwide Children's Hospital (Columbus, OH). Unstained sections were stained for P-glycoprotein by the Nationwide Children's Hospital Morphology Core using the rabbit recombinant antibody MA5-32282 (Thermo Fisher Scientific) at 1:1000 dilution followed by Signal Boost IHC detection reagent (HRO Rabbit) from Cell Signaling (Danvers, MA) and then counterstained with Harris hematoxylin. Liver and tumor P-glycoprotein staining was then evaluated and scored (0, 1+, 2+, or 3+) by L.E.B.

**CHLA258**

|    | PBS | Trab. | oHSV | oHSV + Trab. |
|----|-----|-------|------|--------------|
| CR | 0   | 3     | 0    | 7            |
| PR | 0   | 3     | 0    | 10           |
| SD | 0   | 0     | 0    | 2            |
| PD | 10  | 9     | 9    | 2            |

**EW5**

|    | PBS | Trab. | oHSV | oHSV + Trab. |
|----|-----|-------|------|--------------|
| PR | 0   | 0     | 6    | 9            |
| SD | 0   | 1     | 9    | 7            |
| PD | 10  | 20    | 2    | 2            |

**PDX-0027**

|    | PBS | Trab. | oHSV | oHSV + Trab. |
|----|-----|-------|------|--------------|
| CR | 0   | 0     | 1    | 6            |
| PR | 0   | 0     | 3    | 0            |
| SD | 0   | 0     | 1    | 0            |
| PD | 4   | 4     | 0    | 0            |

**A673**

|    | PBS | Trab. | oHSV | oHSV+Trab. |
|----|-----|-------|------|------------|
| CR | 0   | 0     | 0    | 1          |
| PR | 0   | 0     | 3    | 5          |
| SD | 0   | 0     | 2    | 4          |
| PD | 8   | 6     | 3    | 1          |

**A673 in NSG**

|    | PBS | Trab. | oHSV | oHSV + Trab. |
|----|-----|-------|------|--------------|
| SD | 0   | 0     | 0    | 2            |
| PD | 7   | 11    | 8    | 7            |

**K7M2**

|    | PBS | Trab. | oHSV | oHSV + Trab. |
|----|-----|-------|------|--------------|
| CR | 0   | 1     | 0    | 5            |
| PR | 0   | 1     | 0    | 3            |
| SD | 0   | 0     | 1    | 0            |
| PD | 4   | 7     | 4    | 0            |

**F420**

|    | PBS | Trab. | oHSV | oHSV + Trab. |
|----|-----|-------|------|--------------|
| CR | 0   | 1     | 0    | 2            |
| PR | 0   | 1     | 2    | 1            |
| SD | 0   | 1     | 0    | 3            |
| PD | 4   | 6     | 8    | 0            |

**K7M2 in nude mice**

|    | PBS | Trab. | oHSV | oHSV + Trab. |
|----|-----|-------|------|--------------|
| PR | 0   | 0     | 0    | 1            |
| PD | 5   | 6     | 5    | 7            |

**K7M2 with T cell depletion**

|    | oHSV + Trab. | oHSV + Trab. + anti-CD4 | oHSV + Trab. + anti-CD8 | oHSV + Trab. + anti-CD4 + anti-CD8 |
|----|--------------|-------------------------|-------------------------|------------------------------------|
| CR | 3            | 3                       | 0                       | 0                                  |
| PR | 1            | 0                       | 2                       | 3                                  |
| PD | 1            | 3                       | 5                       | 3                                  |

**K7M2 with NK cell depletion**

|    | PBS | oHSV + Trab. + control serum | oHSV + Trab. | oHSV + Trab. + anti-NK |
|----|-----|------------------------------|--------------|------------------------|
| CR | 0   | 2                            | 2            | 2                      |
| PR | 0   | 1                            | 3            | 2                      |
| SD | 0   | 1                            | 0            | 0                      |
| PD | 8   | 1                            | 1            | 4                      |

**Figure S1. Quantification of best responses for all mouse efficacy studies.** CR, PR, SD, or PD were assigned and quantified for the 28 day treatment response period for all mouse efficacy studies. These best responses were used to determine disease stabilization rates and best overall response rates for each efficacy study.

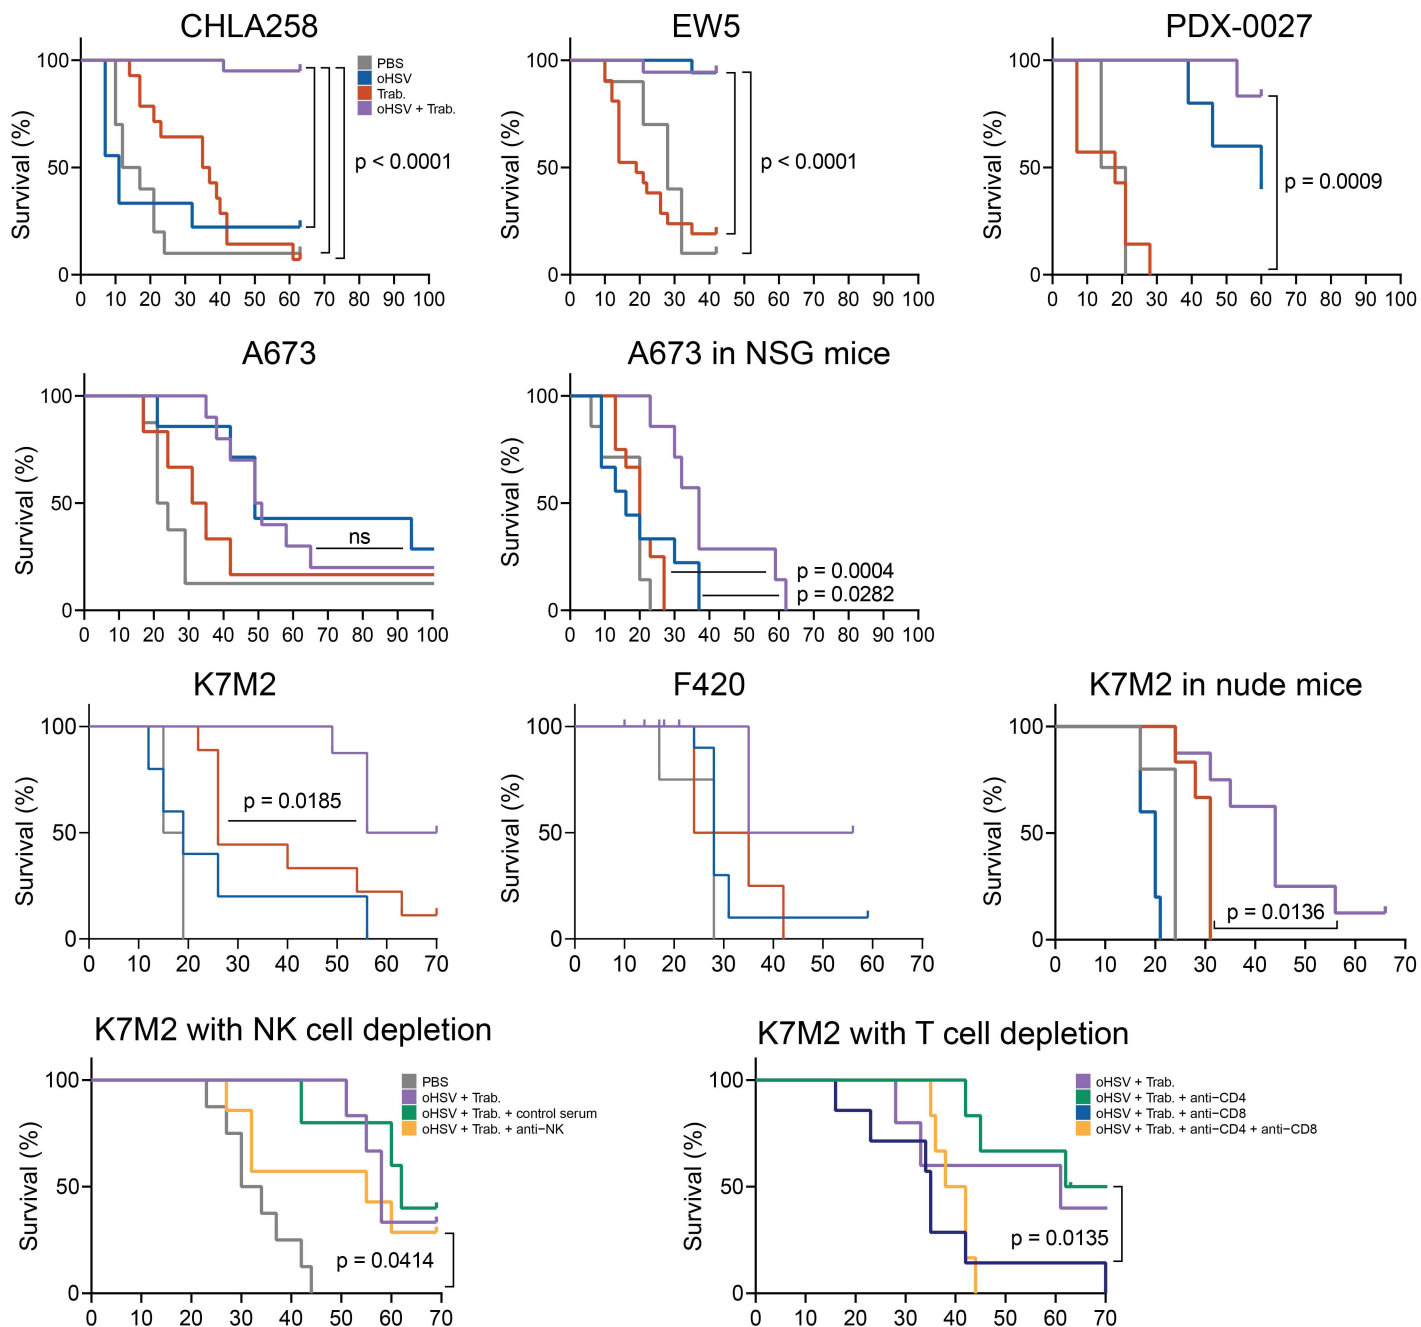

**Figure S2. Survival curves demonstrate the treatment-related survival advantages for all mouse models.** Survival curves were plotted for each mouse efficacy study. Statistical tests were performed using the Mantel-Cox log-rank test. Tick marks represent a survival event that was not a tumor burden-related death.



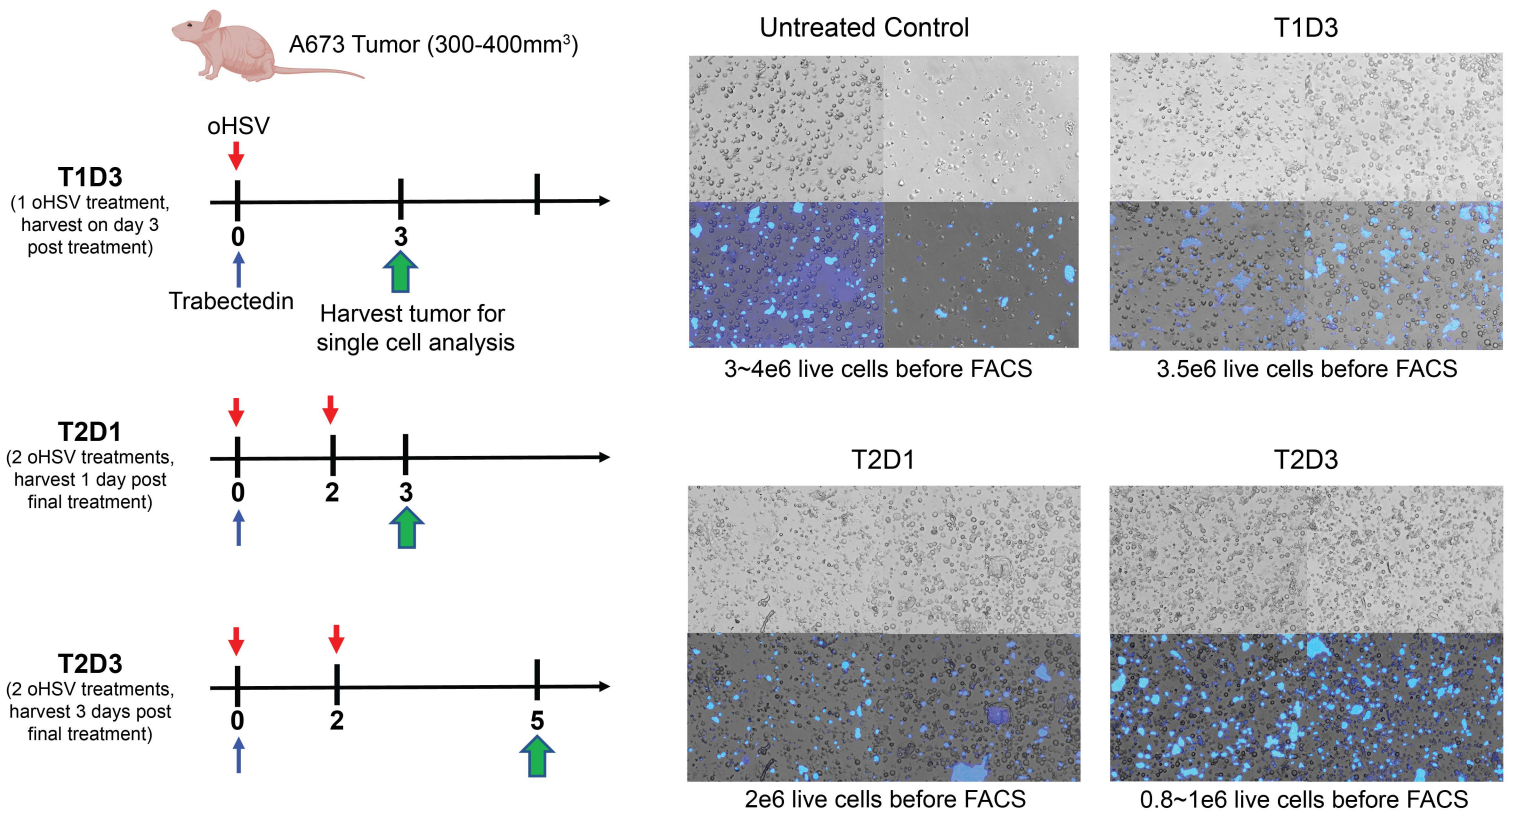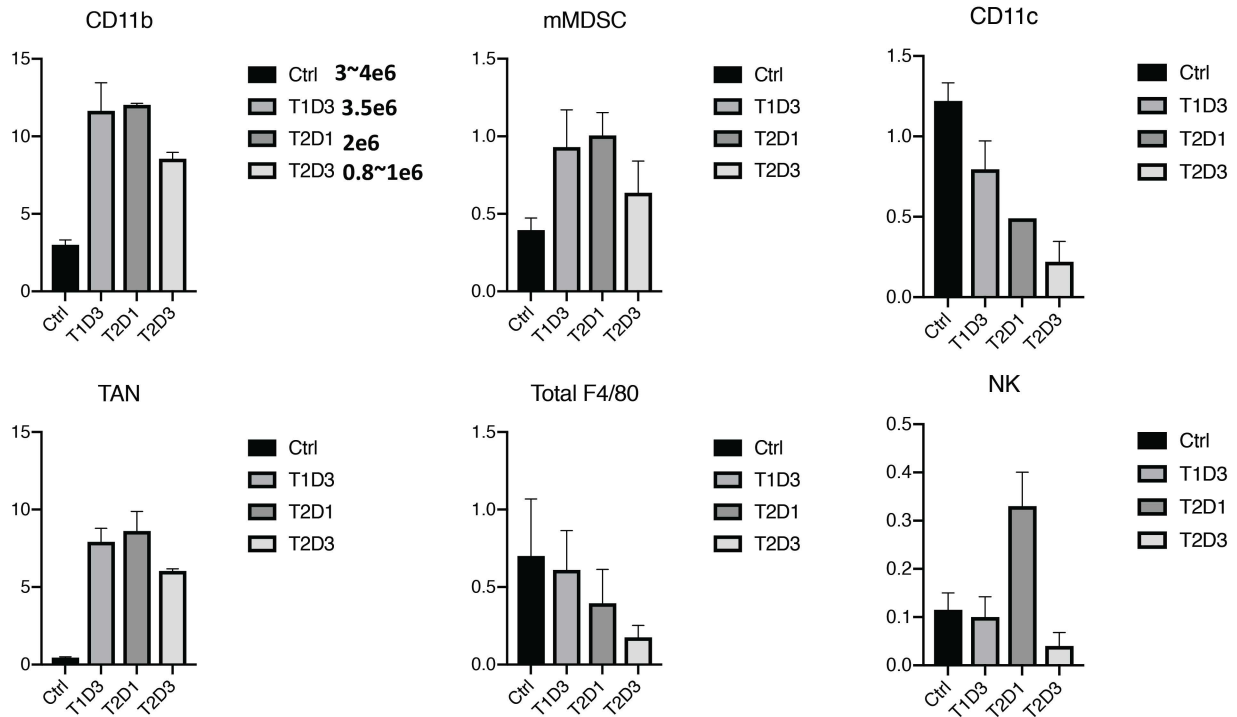

**Figure S3. Two oHSV treatments and a third day tumor harvest provided the best treatment regimen and collection time for optimal scRNAseq samples.** Numerous treatment regimens and collection times (shown in the schemata) were tested to determine the best scRNAseq sample quality. Following tumor collection from treated mice and subsequent disassociation, microscopy of the cells stained with DAPI was used to determine the live cell counts for each scRNAseq preparation. Cellular infiltrate levels were determined from FACS analysis of each tumor collection.

**A**

|                       | p_val     | avg_log2FC | pct.1  | pct.2 | p_val_adj |           |
|-----------------------|-----------|------------|--------|-------|-----------|-----------|
| Immediate Early Genes | HSV1-US1  | 2.63E-123  | 0.658  | 0.611 | 0.363     | 4.33E-119 |
|                       | HSV1-UL54 | 1.51E-98   | 0.696  | 0.36  | 0.177     | 2.49E-94  |
|                       | HSV1-RS1  | 5.06E-36   | 0.105  | 0.078 | 0.026     | 8.32E-32  |
|                       | HSV1-US12 | 8.07E-14   | 0.085  | 0.061 | 0.031     | 1.33E-09  |
|                       | HSV1-RL2  | 1.20E-13   | 0.027  | 0.026 | 0.008     | 1.97E-09  |
| Early Genes           | HSV1-UL50 | 3.59E-54   | 0.645  | 0.223 | 0.111     | 5.91E-50  |
|                       | HSV1-UL29 | 9.16E-52   | 1.030  | 0.183 | 0.085     | 1.51E-47  |
|                       | HSV1-UL2  | 2.32E-40   | 0.631  | 0.167 | 0.083     | 3.82E-36  |
|                       | HSV1-UL23 | 1.46E-23   | -0.042 | 0.154 | 0.091     | 2.40E-19  |
| Late Genes            | HSV1-UL48 | 8.09E-120  | 1.071  | 0.386 | 0.179     | 1.33E-115 |
|                       | HSV1-UL27 | 2.84E-65   | 0.799  | 0.292 | 0.153     | 4.67E-61  |
|                       | HSV1-UL41 | 2.03E-24   | 0.557  | 0.107 | 0.054     | 3.34E-20  |
|                       | HSV1-UL19 | 6.03E-15   | 0.404  | 0.082 | 0.046     | 9.92E-11  |
|                       | HSV1-UL44 | 1.71E-12   | 0.151  | 0.054 | 0.028     | 2.82E-08  |
| HSV1-UL53             | 6.41E-06  | -0.025     | 0.057  | 0.038 | 1.06E-01  |           |

**B**

|                                                                                   | p_val         | avg_log2FC | pct.1  | pct.2 | p_val_adj |           |
|-----------------------------------------------------------------------------------|---------------|------------|--------|-------|-----------|-----------|
| Genes from KEGG Herpes Simplex Virus 1 Pathway with $ \text{avg\_log2FC}  > 0.05$ | PDIA3 (ERp57) | 8.97E-217  | -0.605 | 0.846 | 0.888     | 1.48E-212 |
|                                                                                   | JAK1          | 1.07E-99   | -0.414 | 0.885 | 0.888     | 1.76E-95  |
|                                                                                   | CALR          | 5.98E-46   | -0.300 | 0.901 | 0.901     | 9.84E-42  |
|                                                                                   | ALYREF        | 3.91E-30   | -0.282 | 0.555 | 0.563     | 6.43E-26  |
|                                                                                   | SOCS3         | 4.60E-61   | 0.280  | 0.686 | 0.514     | 7.57E-57  |
|                                                                                   | PTPN11        | 1.09E-26   | -0.245 | 0.493 | 0.507     | 1.79E-22  |
|                                                                                   | BIRC2         | 1.38E-19   | -0.223 | 0.496 | 0.505     | 2.27E-15  |
|                                                                                   | EIF4EBP1      | 3.52E-10   | -0.183 | 0.685 | 0.664     | 5.78E-06  |
|                                                                                   | SRPK1         | 3.24E-06   | -0.158 | 0.522 | 0.485     | 5.32E-02  |
|                                                                                   | B2M           | 2.64E-23   | -0.149 | 0.986 | 0.989     | 4.34E-19  |
|                                                                                   | HLA-A         | 2.14E-25   | 0.143  | 0.861 | 0.790     | 3.51E-21  |
|                                                                                   | RHEB          | 8.49E-06   | -0.136 | 0.652 | 0.598     | 1.40E-01  |
|                                                                                   | BST2          | 2.31E-35   | 0.119  | 0.242 | 0.144     | 3.81E-31  |
|                                                                                   | IFNGR1        | 1.43E-01   | -0.114 | 0.321 | 0.296     | 1.00E+00  |
|                                                                                   | EIF2S1        | 2.74E-02   | -0.114 | 0.595 | 0.538     | 1.00E+00  |
|                                                                                   | NFKBIA        | 3.31E-01   | -0.103 | 0.665 | 0.600     | 1.00E+00  |
|                                                                                   | STAT1         | 2.98E-02   | -0.098 | 0.439 | 0.379     | 1.00E+00  |
|                                                                                   | BCL2          | 1.97E-04   | -0.093 | 0.128 | 0.145     | 1.00E+00  |
|                                                                                   | BID           | 9.11E-01   | -0.090 | 0.462 | 0.408     | 1.00E+00  |
|                                                                                   | IFNAR1        | 6.84E-01   | -0.090 | 0.425 | 0.368     | 1.00E+00  |
|                                                                                   | TBK1          | 8.64E-01   | -0.070 | 0.239 | 0.221     | 1.00E+00  |
|                                                                                   | FAS           | 1.28E-01   | -0.067 | 0.219 | 0.191     | 1.00E+00  |
|                                                                                   | PIK3CA        | 8.95E-02   | -0.065 | 0.290 | 0.250     | 1.00E+00  |
|                                                                                   | CASP3         | 1.01E-02   | -0.065 | 0.475 | 0.397     | 1.00E+00  |
|                                                                                   | BAX           | 9.42E-01   | -0.064 | 0.559 | 0.492     | 1.00E+00  |
|                                                                                   | APAF1         | 6.77E-01   | -0.060 | 0.231 | 0.217     | 1.00E+00  |
|                                                                                   | SRSF1         | 3.50E-01   | -0.057 | 0.702 | 0.608     | 1.00E+00  |
|                                                                                   | IRAK1         | 9.08E-03   | -0.056 | 0.339 | 0.285     | 1.00E+00  |
|                                                                                   | TNFRSF1A      | 2.99E-03   | -0.054 | 0.455 | 0.379     | 1.00E+00  |
| EIF2AK2                                                                           | 3.70E-02      | -0.052     | 0.586  | 0.503 | 1.00E+00  |           |
| BAD                                                                               | 1.45E-01      | -0.051     | 0.564  | 0.490 | 1.00E+00  |           |
| IFN Type I Genes from KEGG Herpes Simplex Virus 1 Pathway                         | IRF3          | 2.95E-25   | 0.046  | 0.422 | 0.293     | 4.85E-21  |
|                                                                                   | IFNAR2        | 2.17E-03   | -0.042 | 0.257 | 0.211     | 1.00E+00  |
|                                                                                   | IRF7          | 8.16E-33   | 0.040  | 0.235 | 0.137     | 1.34E-28  |

**Figure S4. Trabectedin increases the expression of HSV-1 genes associated with immediate early, early, and late infection and decreases the expression of genes associated with the intracellular response to HSV-1.** The log fold change average expression values (avg\_log2FC) for A) time-dependent HSV-1 genes and B) genes from the KEGG “Herpes Simplex Virus 1 Pathway” pathview schema – genes with  $|\text{avg\_log2FC}| > 0.05$  (top) and IFN Type I related genes (bottom) – were calculated for oHSV+Trabectedin- compared to oHSV-treated A673 tumors (Seurat, clusterProfiler, pathview). The unadjusted p-value (p\_val), percent of cells expressing each gene in tumor cells treated with oHSV+Trabectedin (pct.1) or oHSV alone (pct.2), and adjusted p-value using a Bonferroni correction accounting for all genes present in the A673 tumor dataset (p\_val\_adj) are also shown.

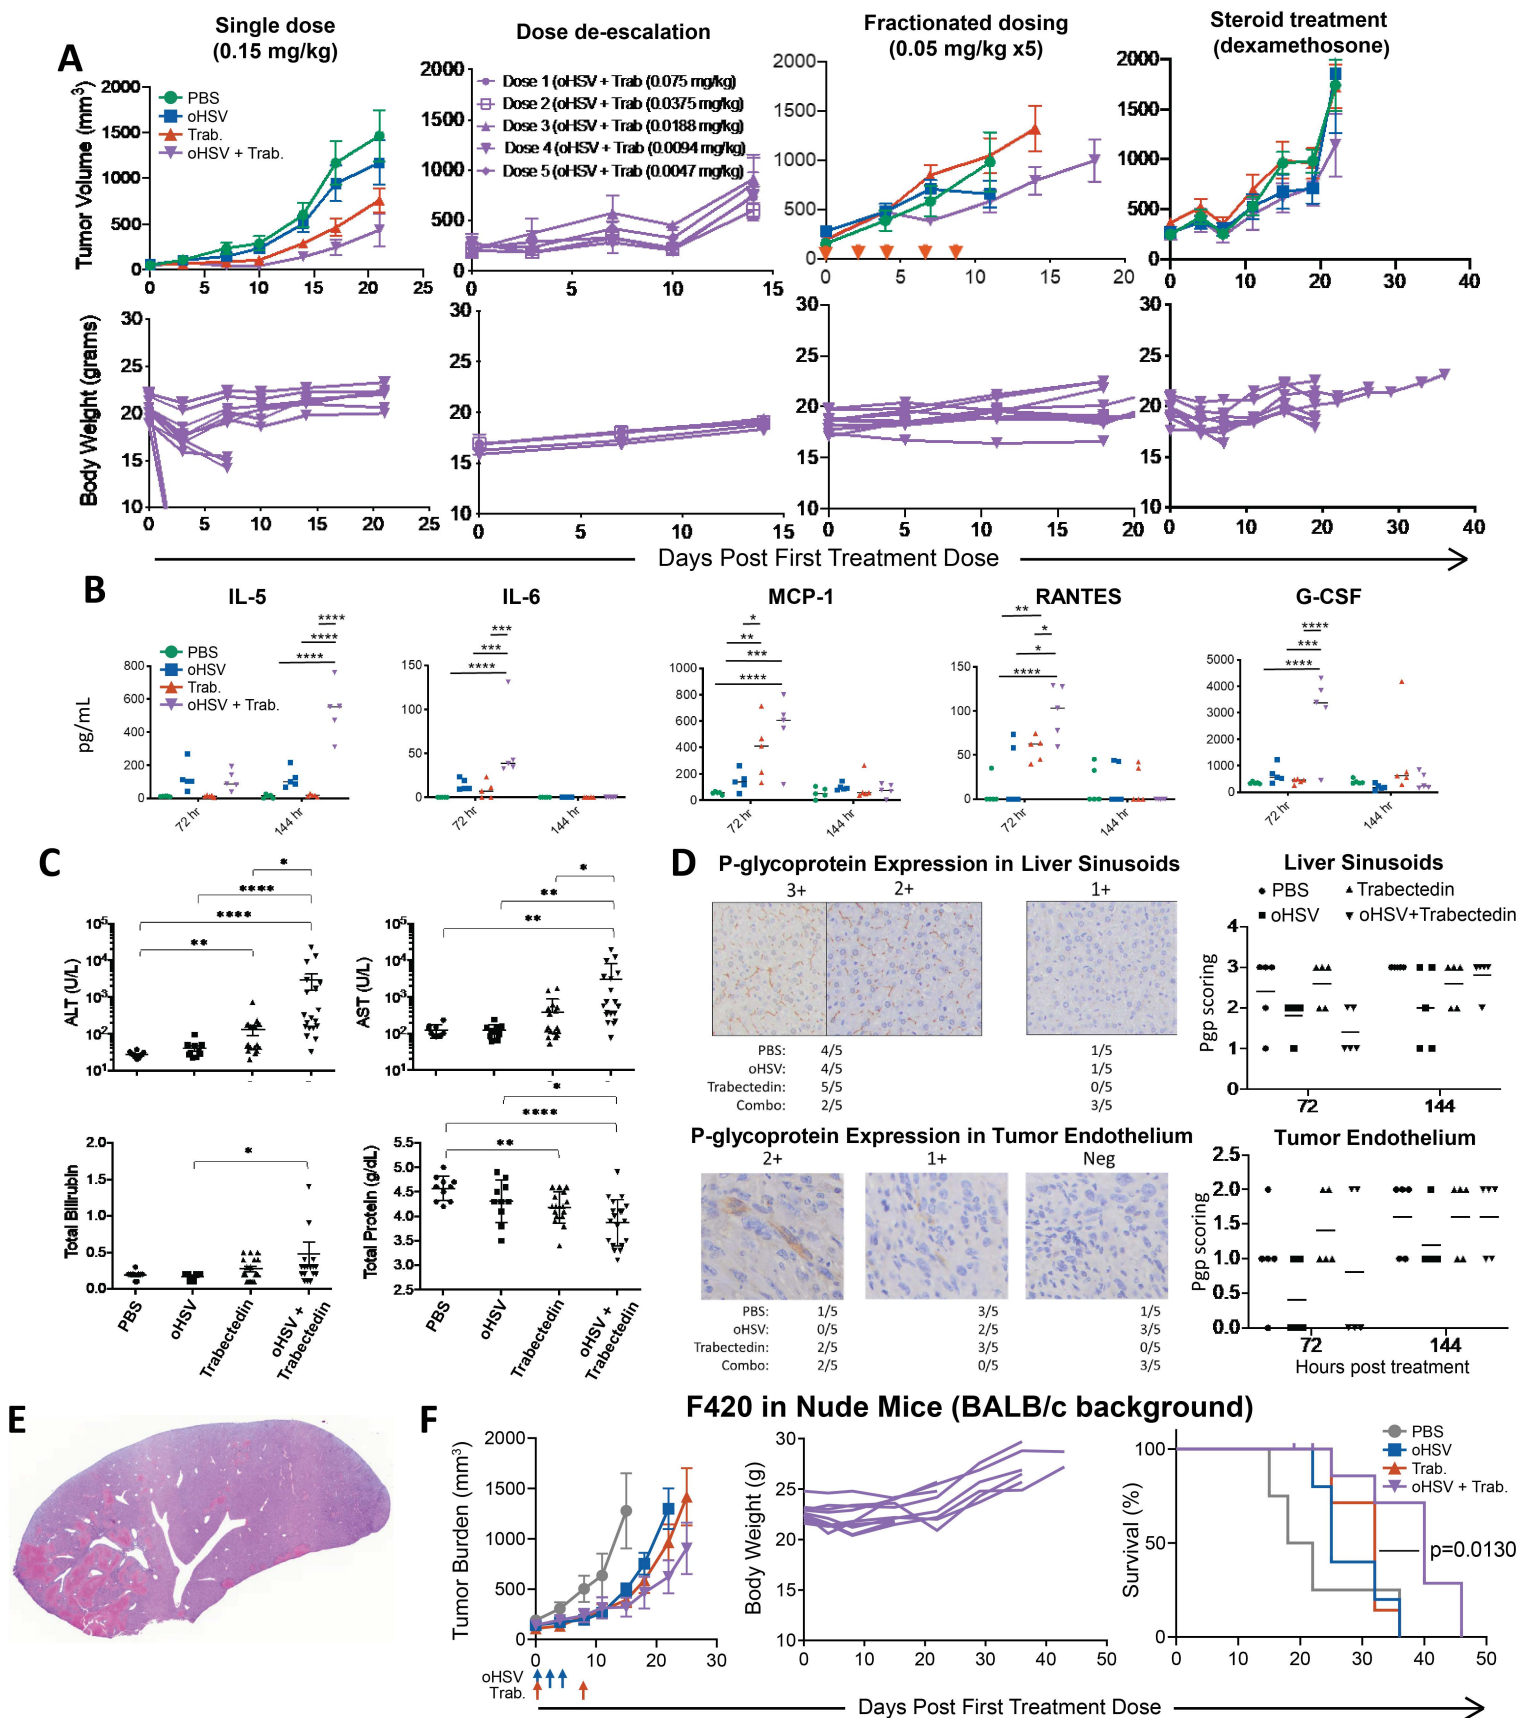

**Figure S5. Toxicity studies in the F420 tumor model reveal trabectedin-related, mouse model-dependent hepatotoxicity.** A) Trabectedin dose alteration – single dose, decreased concentration(s), fractionated dosing (0.05mg/kg on days 0, 2, 4, 6, 8), and steroid treatment (40mg/kg dexamethasone on days -2,-1, 5, 6) – resulted in body weight stabilization but higher tumor burdens. B) Cytokine and C) toxicology levels were quantified from blood samples of treated B6-albino mice (\* $p < 0.05$ , \*\* $p < 0.01$ , \*\*\* $p < 0.001$ ). D) Liver and tumor P-glycoprotein histological expression and scoring was determined for treated tumor-bearing B6-albino mice. E) A liver histological section from a combination-treated B6-albino mouse displayed hepatotoxicity, with necrosis shown in red. F) Tumor burden, body weight, and survival curves for treated F420 Athymic nude mice (BALB/c background) showed safety but decreased combinatorial efficacy.



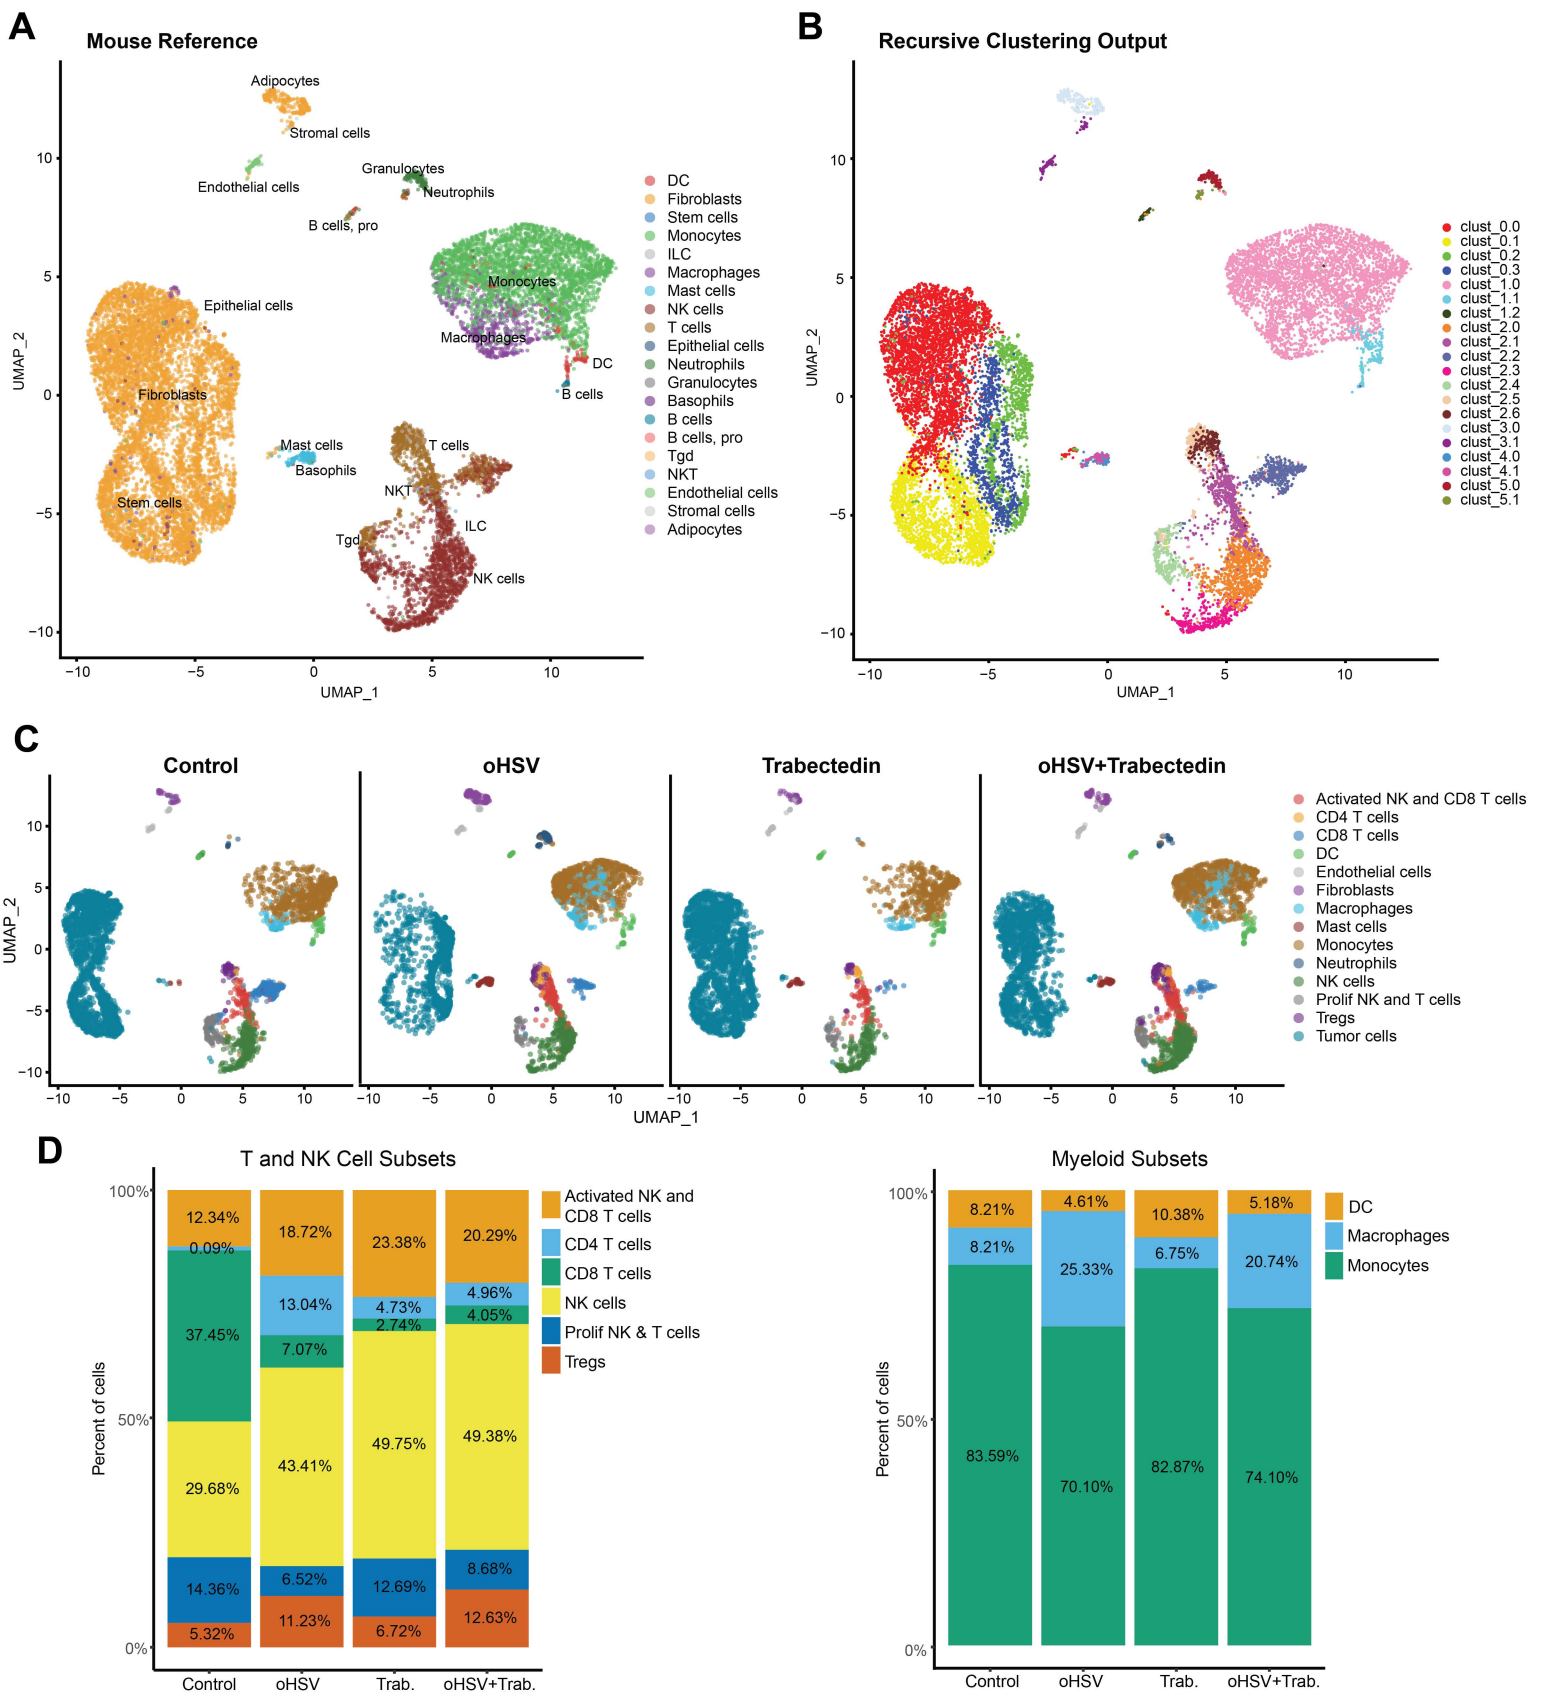

**Figure S6. scRNAseq analysis depicts the innate and adaptive immune cells infiltrating the osteosarcoma microenvironment.** A) The reference-based SingleR package annotated the dataset with mouse cell type assignment. B) The output from unsupervised recursive clustering showed distinct clusters related to cell type. C) Using these results and cell type-specific differential gene expression analysis, we assigned cell types and visualized these across treatment groups. D) Stacked barplots (ggplot2) demonstrated the relative proportion of specific cell types from two larger cohorts: T and NK lymphocytes and myeloid cells. The datasets for each treatment group were merged without a need for integration and plotted in the same UMAP space (Seurat).



**A**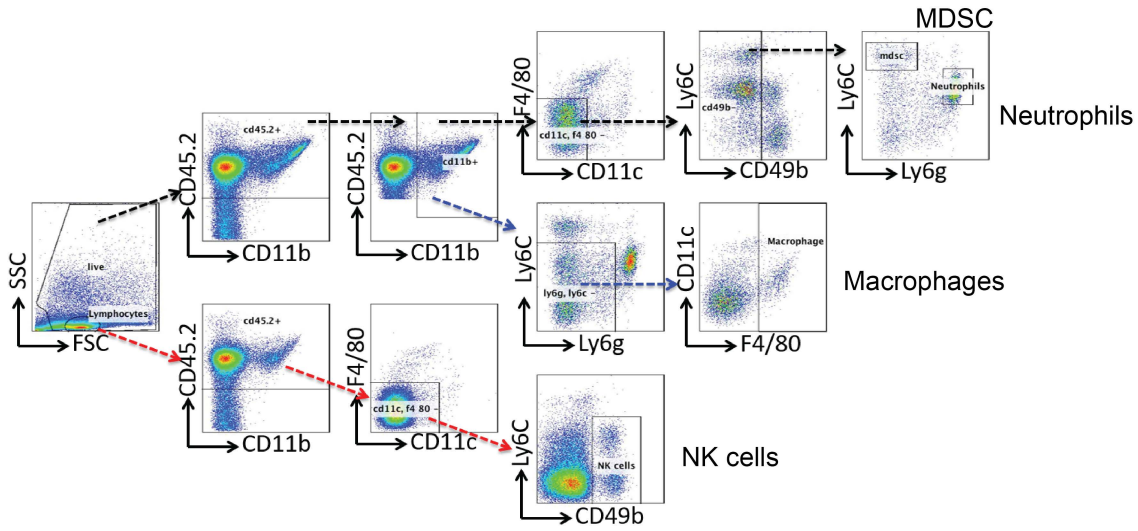**B**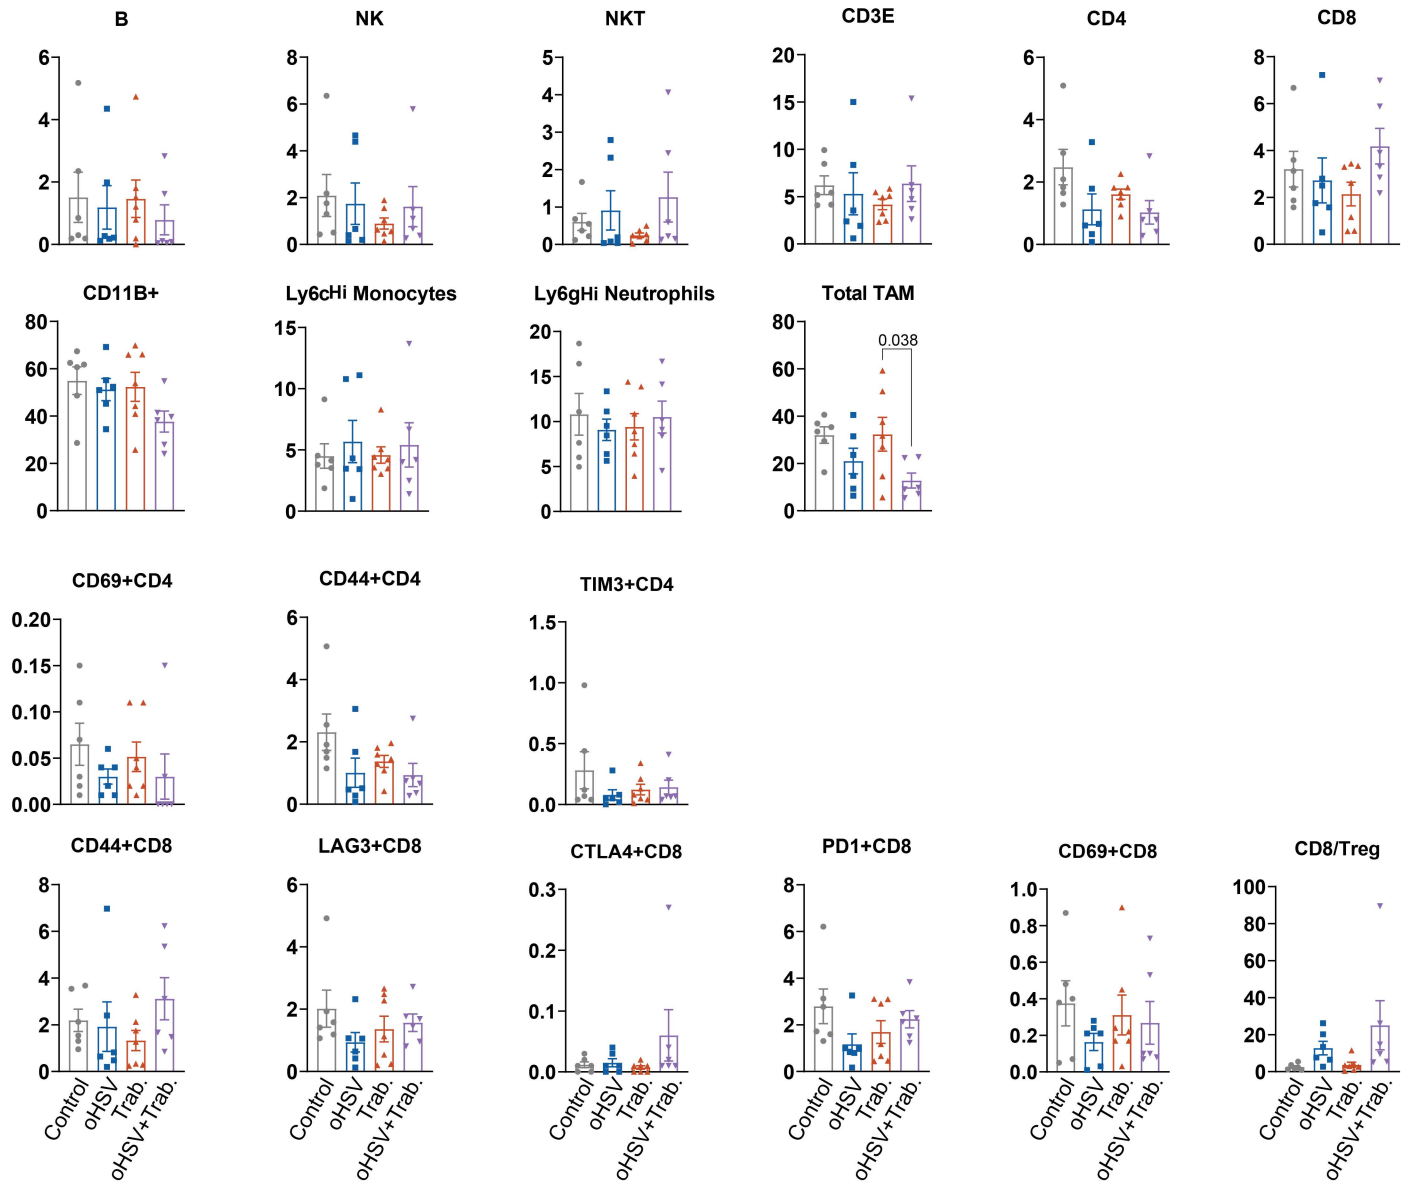

**Figure S7. FACS gating strategy and cellular infiltrates in treated-K7M2 tumors.** A) An example FACS gating strategy is shown for innate immune subsets. B) The FACS cellular infiltrate results that did not meet significance ( $p < 0.05$ ) from the treated K7M2 tumors demonstrated minor changes in cellular infiltrates after treatment, with the exception of Total TAM infiltrates ( $p$  value shown). One-way ANOVA with Dunnett's multiple comparisons test was used to calculate  $p$  values (each treatment cohort was compared to the combination cohort). Error bars depict mean  $\pm$  SEM. The treatment regimen followed the previously described methodology for Figure 4.
